# Supplementary material for: Ultrasound-assisted synthesis of novel 2-aryl-3-ethoxy-5-methyl-3-oxido-2 H -thiazolo[2,3- e ][1,4,2]diazaphosphole-6-carboxylates and their anticancer efficacy in inducing apoptosis and autophagy and targeting cell cycle progression
Source: Royal Society of Chemistry journal article supplement (doi:10.1039/d4ra07173e), 2024-01-01
Supplement: d4ra07173e1.pdf [file d4ra07173e1.pdf]

## Supplementary Information

### Ultrasound-Assisted Synthesis of Novel 2-Aryl-3-Ethoxy-5-Methyl-3-Oxido-2*H*-Thiazolo [2,3-*e*][1,4,2]Diazaphosphole-6-Carboxylates Induce Apoptosis, Autophagy and Target Cell Cycle Progression in Anticancer Efficacy

Wafa A. Bawazir,<sup>1</sup> Tarik E. Ali,<sup>2,3\*</sup> Mohammed A. Assiri,<sup>3</sup> Ali A. Shati,<sup>4</sup> Mohammad Y. Alfaifi,<sup>4</sup> and Serag E. I. Elbehairi<sup>4</sup>

<sup>1</sup>*Chemistry Department, Faculty of Science, King Abdulaziz University, Jeddah, Saudi Arabia*

<sup>2</sup>*Central Labs, King Khalid University, AlQuraa, Abha, Saudi Arabia*

<sup>3</sup>*Department of Chemistry, Faculty of Science, King Khalid University, AlQuraa, Abha, Saudi Arabia*

<sup>4</sup>*Department of Biology, Faculty of Science, King Khalid University, AlQuraa, Abha, Saudi Arabia*

E-mail\*: tarik\_elsayed1975@yahoo.com, tismail@kku.edu.sa

## Contents

**Figures S1-S40:** Copies of <sup>1</sup>H- <sup>13</sup>C-and <sup>31</sup>P-NMR and MS spectral data for the synthesized compounds **2a-j**.

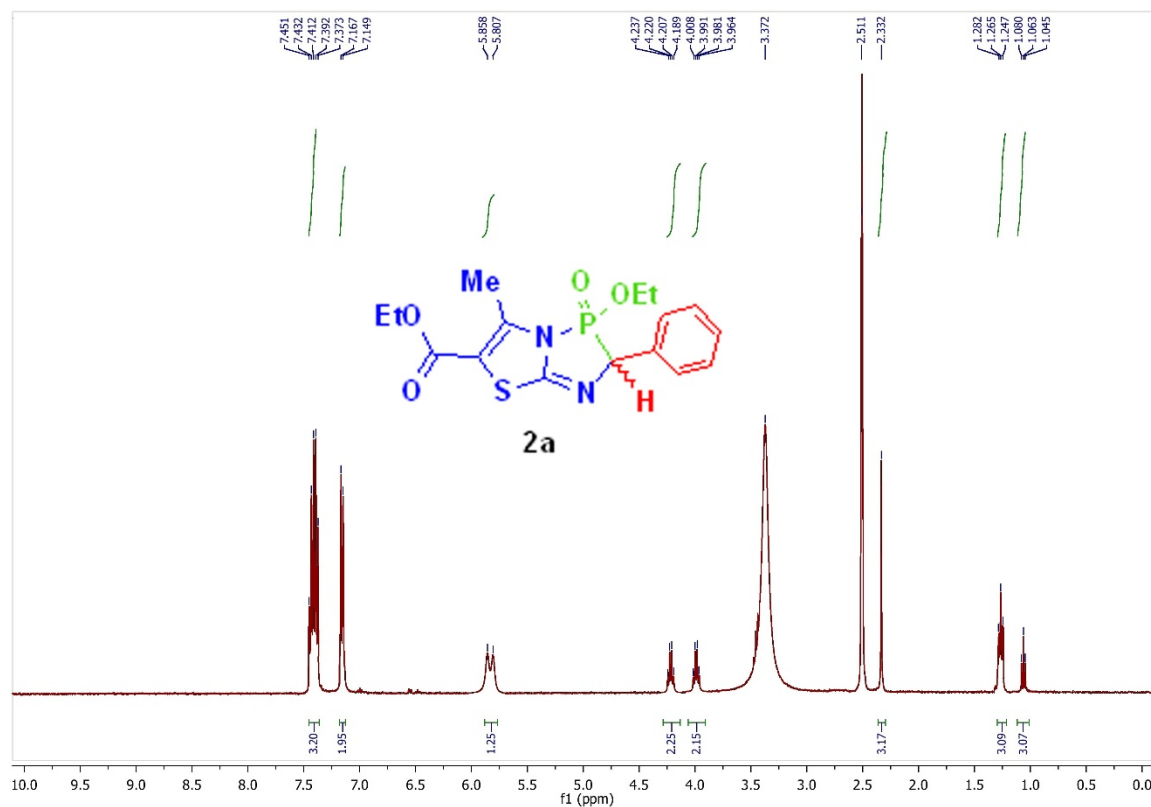

**Figure S1:** The <sup>1</sup>H-NMR spectrum of compound **2a**.

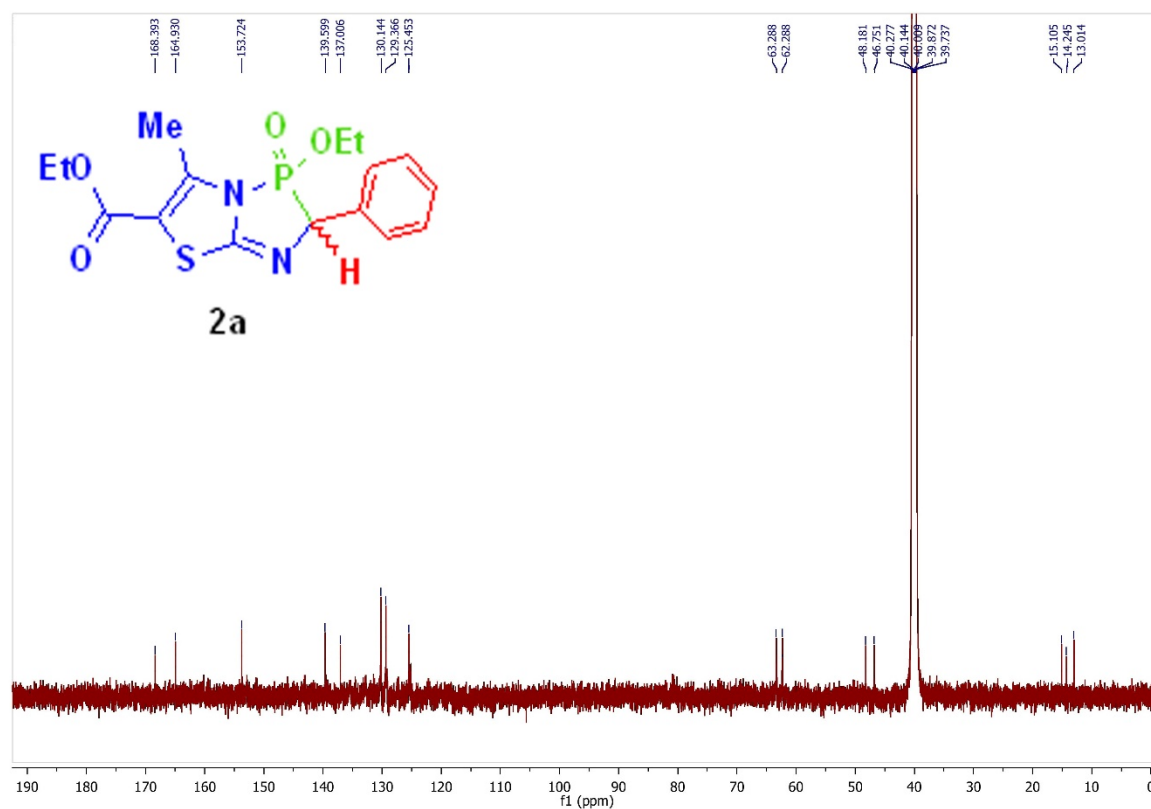

**Figure S2:** The <sup>13</sup>C-NMR spectrum of compound **2a**.

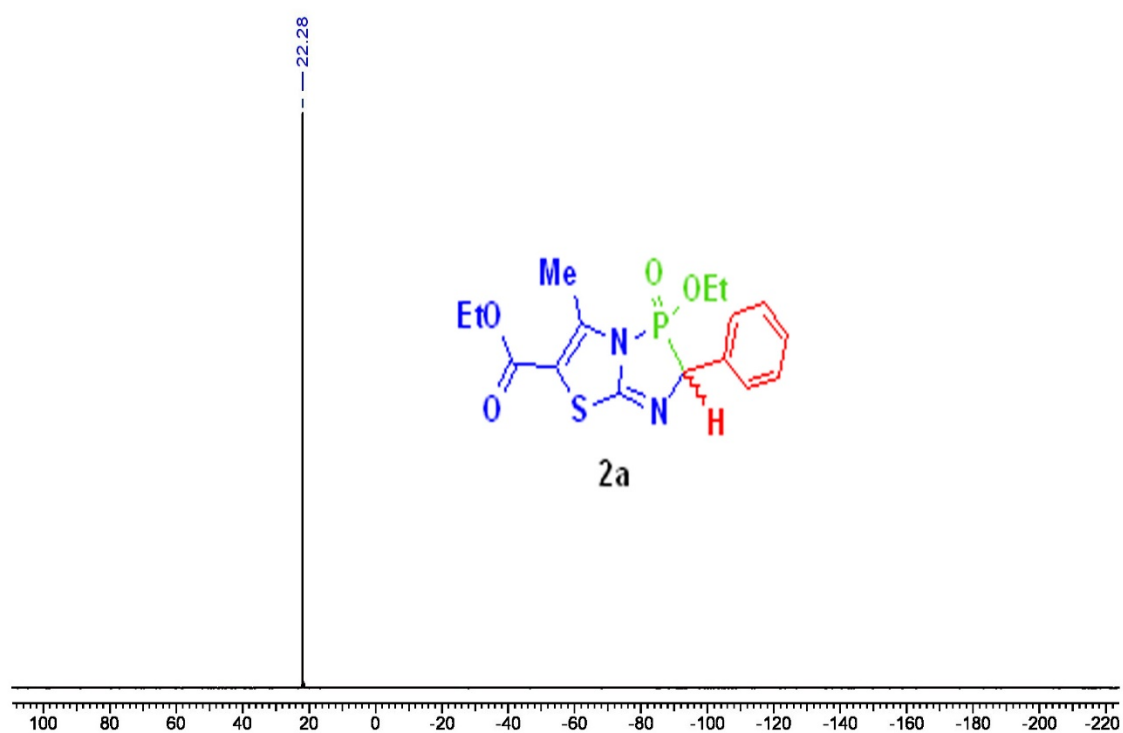

**Figure S3:** The <sup>31</sup>P-NMR spectrum of compound 2a.

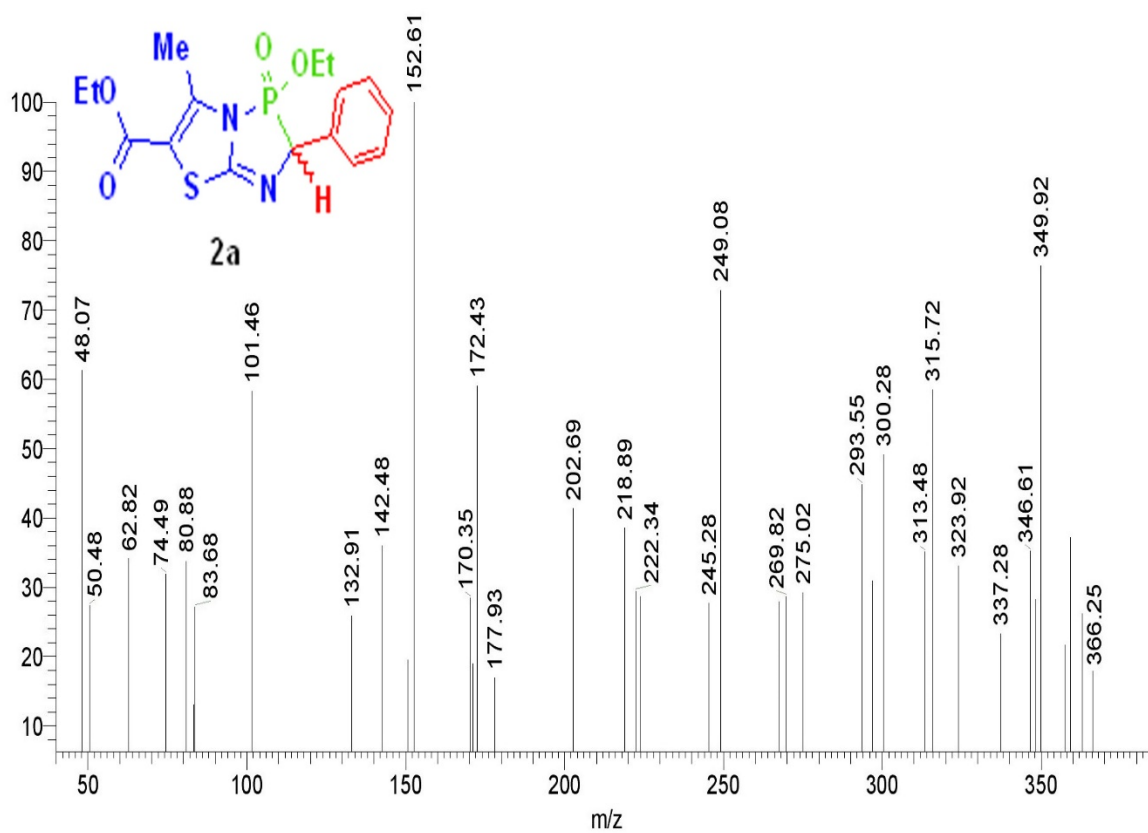

**Figure S4:** The mass spectrum of compound 2a.

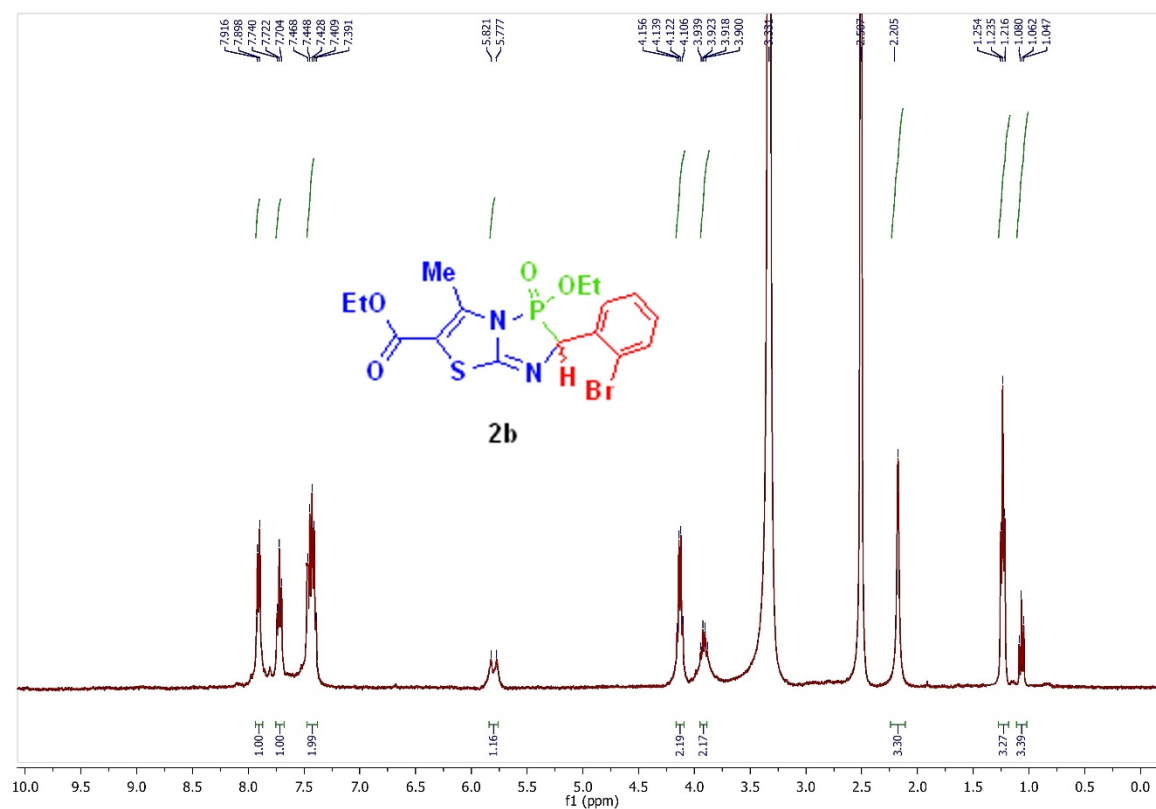

**Figure S5:** The <sup>1</sup>H-NMR spectrum of compound **2b**.

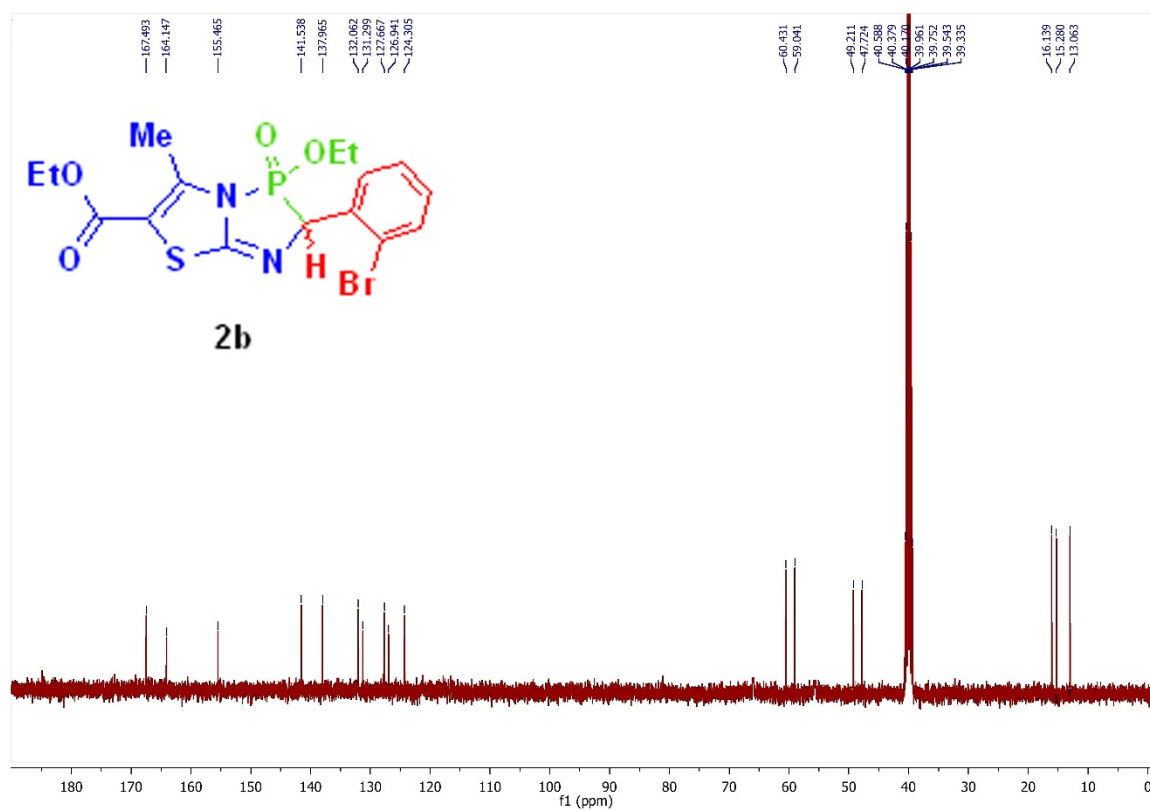

**Figure S6:** The <sup>13</sup>C-NMR spectrum of compound **2b**.

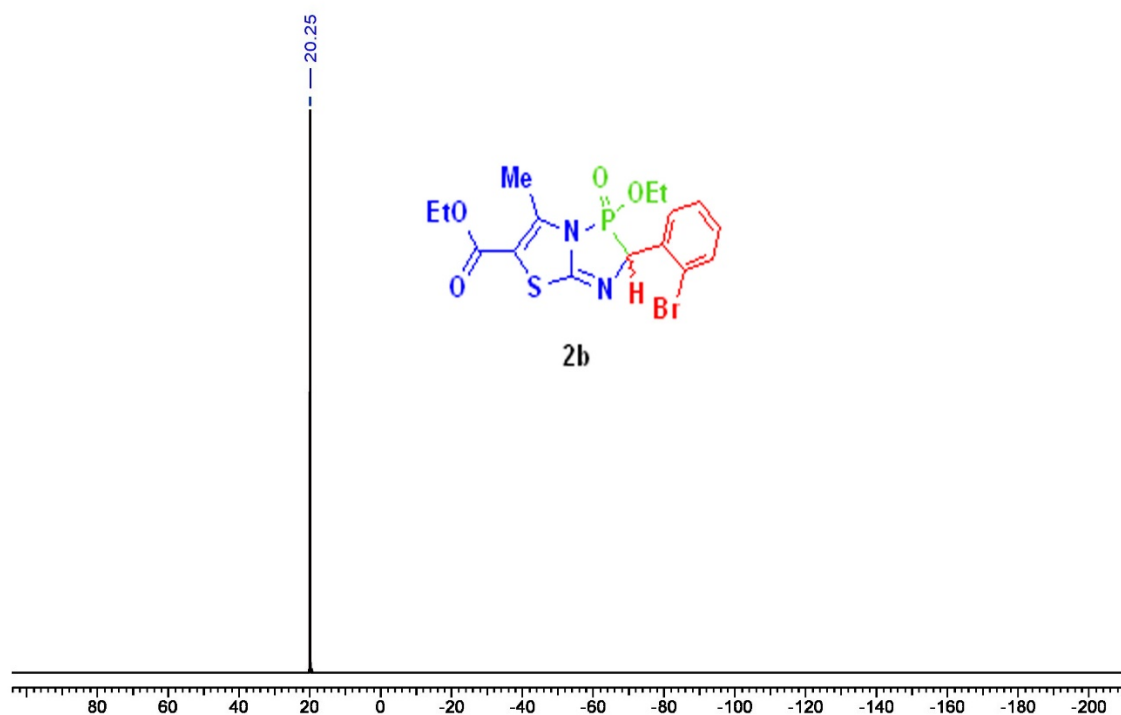

**Figure S7:** The <sup>31</sup>P-NMR spectrum of compound **2b**.

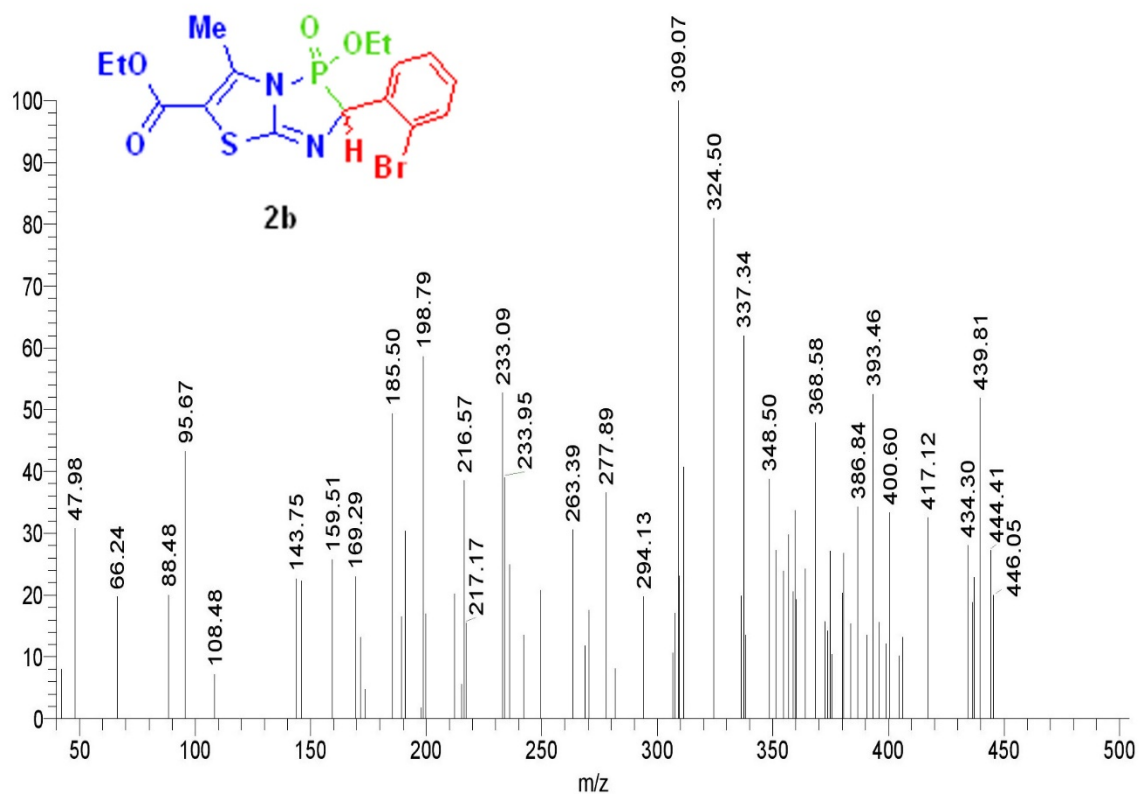

**Figure S8:** The mass spectrum of compound **2b**.

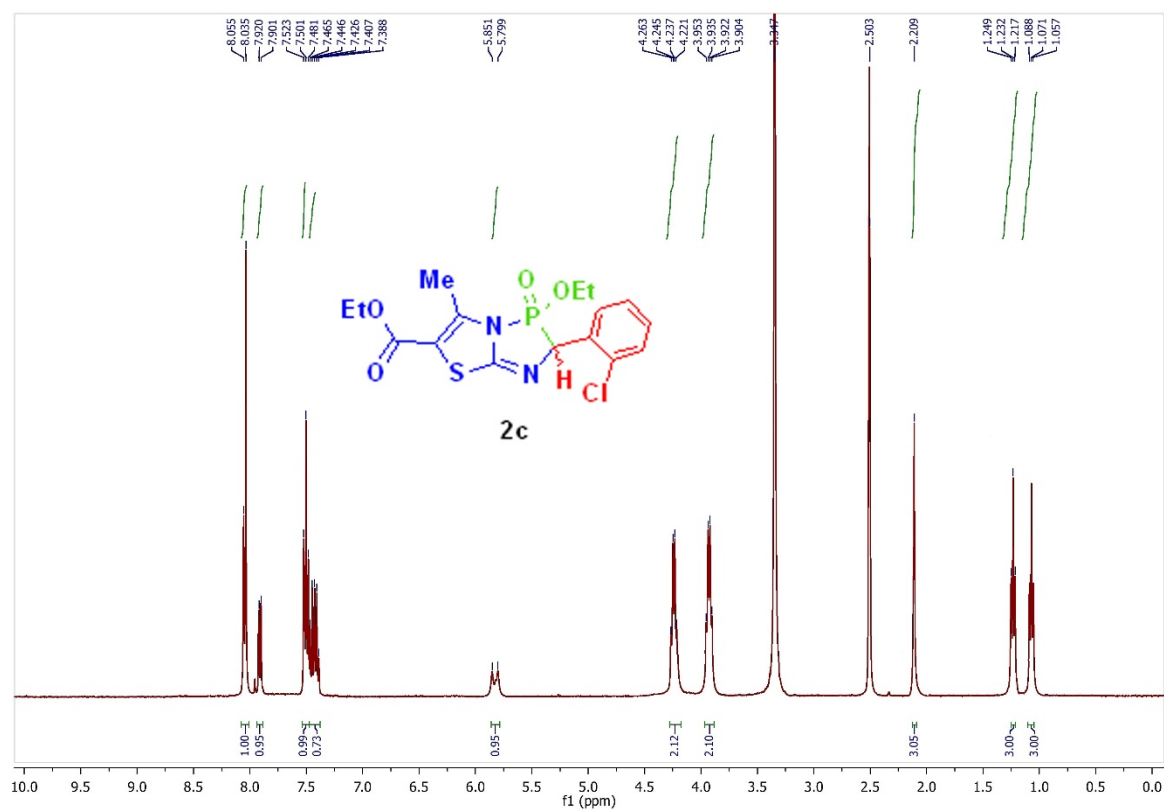

Figure S9: The <sup>1</sup>H-NMR spectrum of compound **2c**.

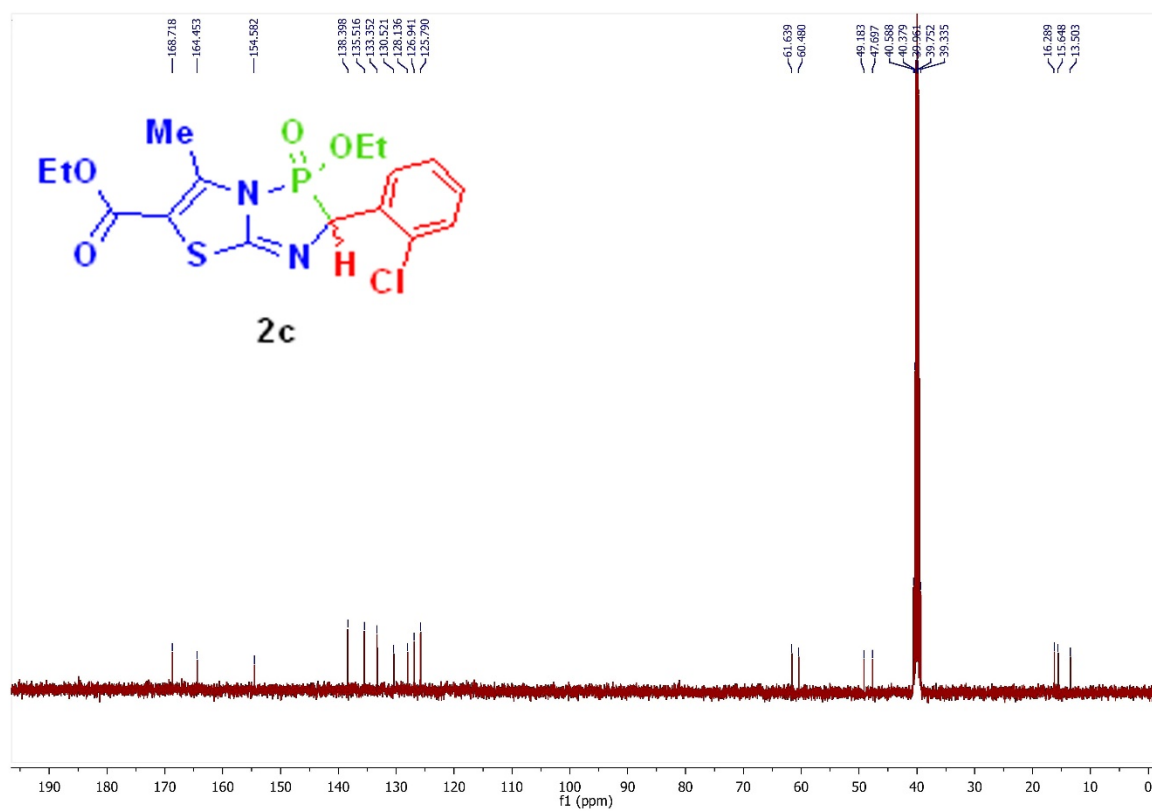

Figure S10: The <sup>13</sup>C-NMR spectrum of compound **2c**.

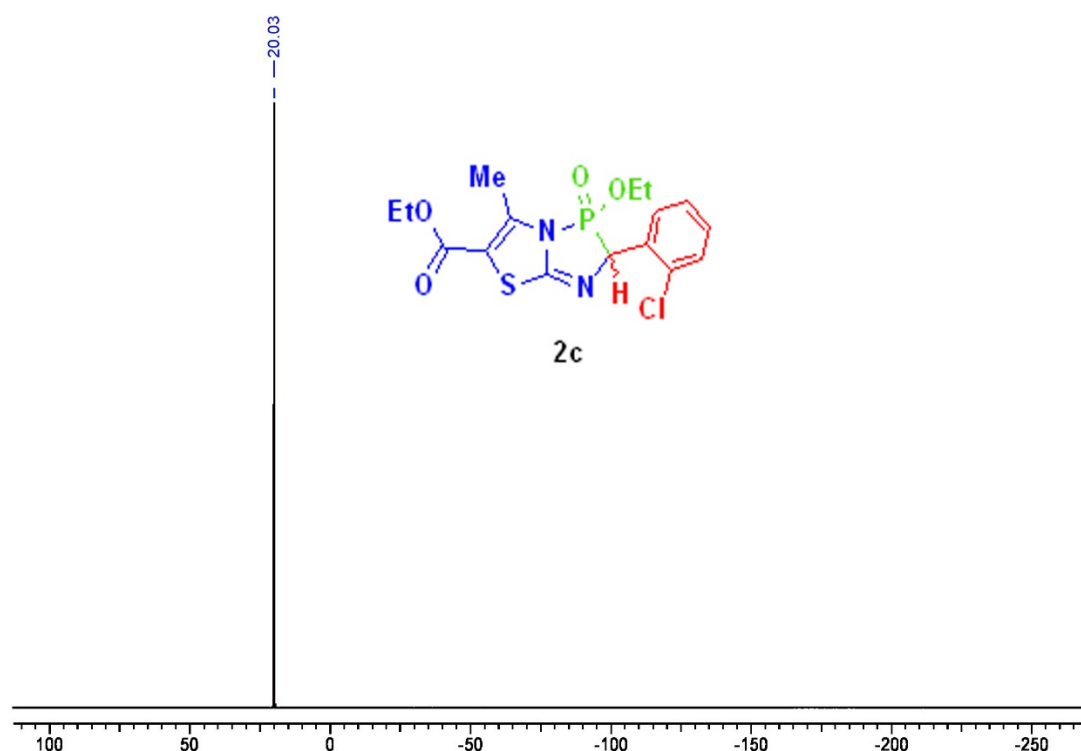

**Figure S11:** The  $^{31}\text{P}$ -NMR spectrum of compound **2c**.

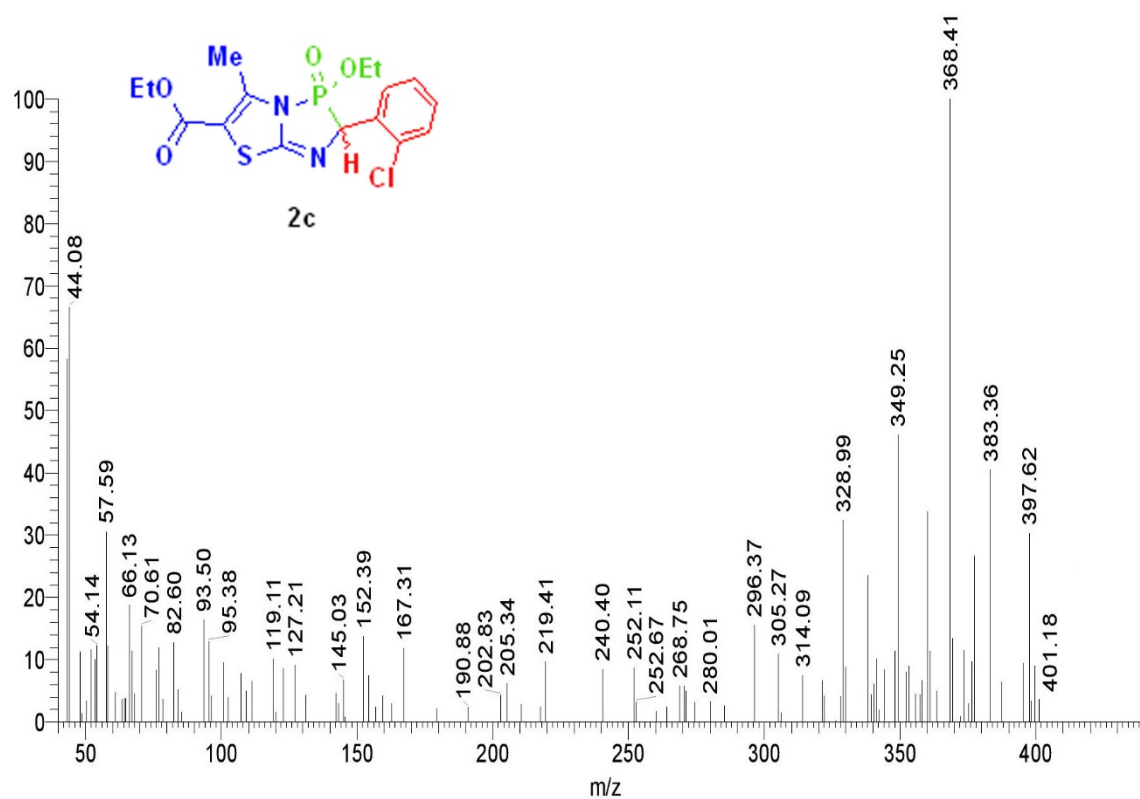

**Figure S12:** The mass spectrum of compound **2c**.

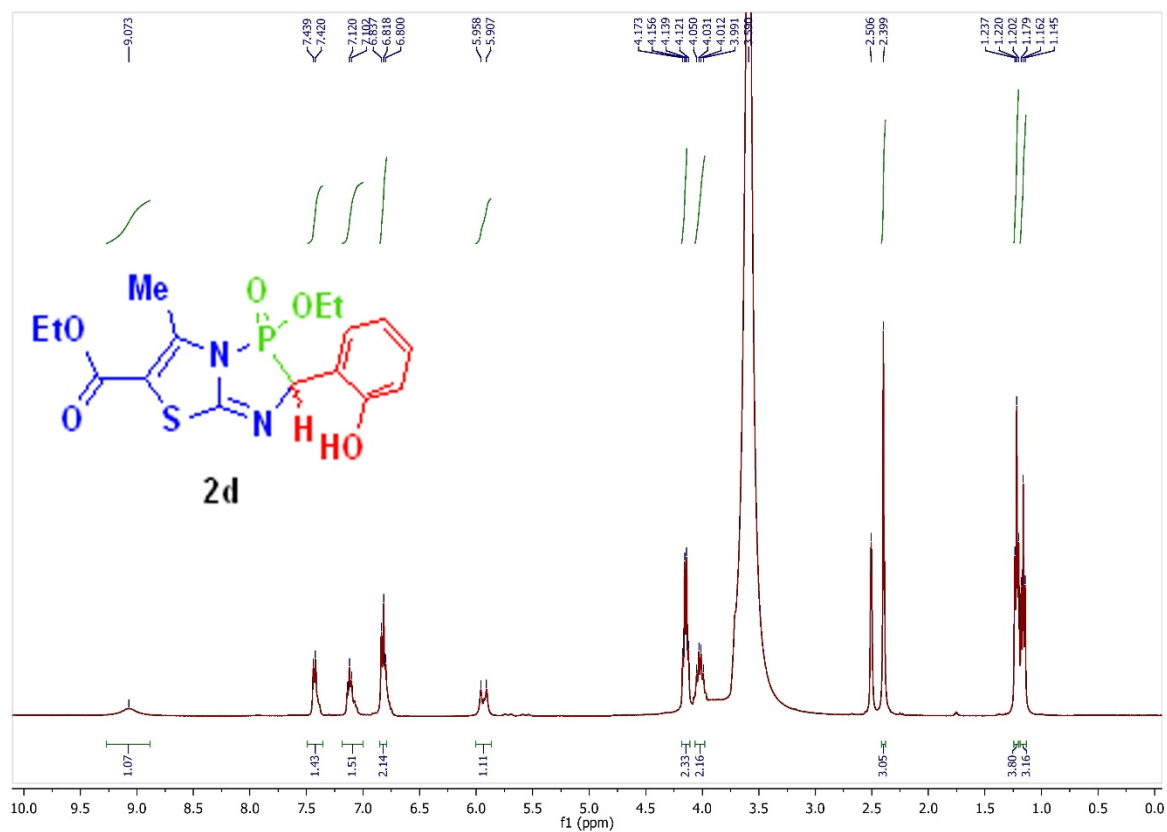

**Figure S13:** The <sup>1</sup>H-NMR spectrum of compound **2d**.

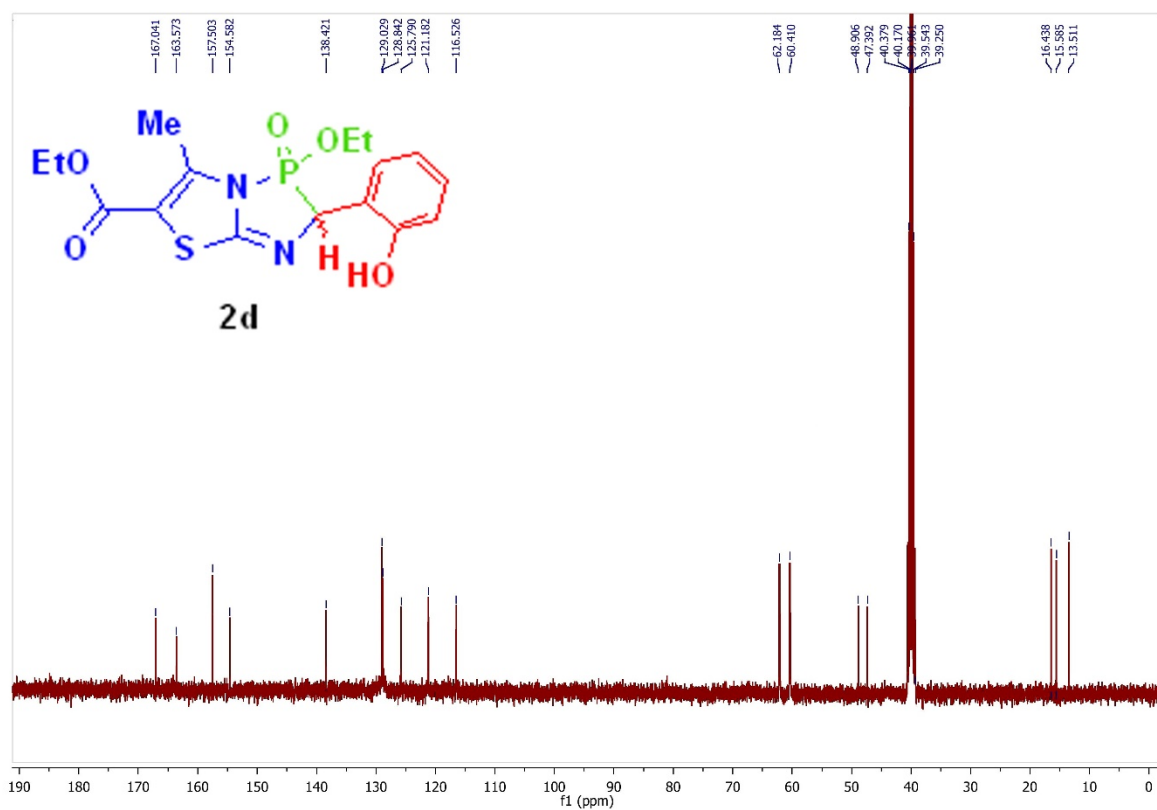

**Figure S14:** The <sup>13</sup>C-NMR spectrum of compound **2d**.

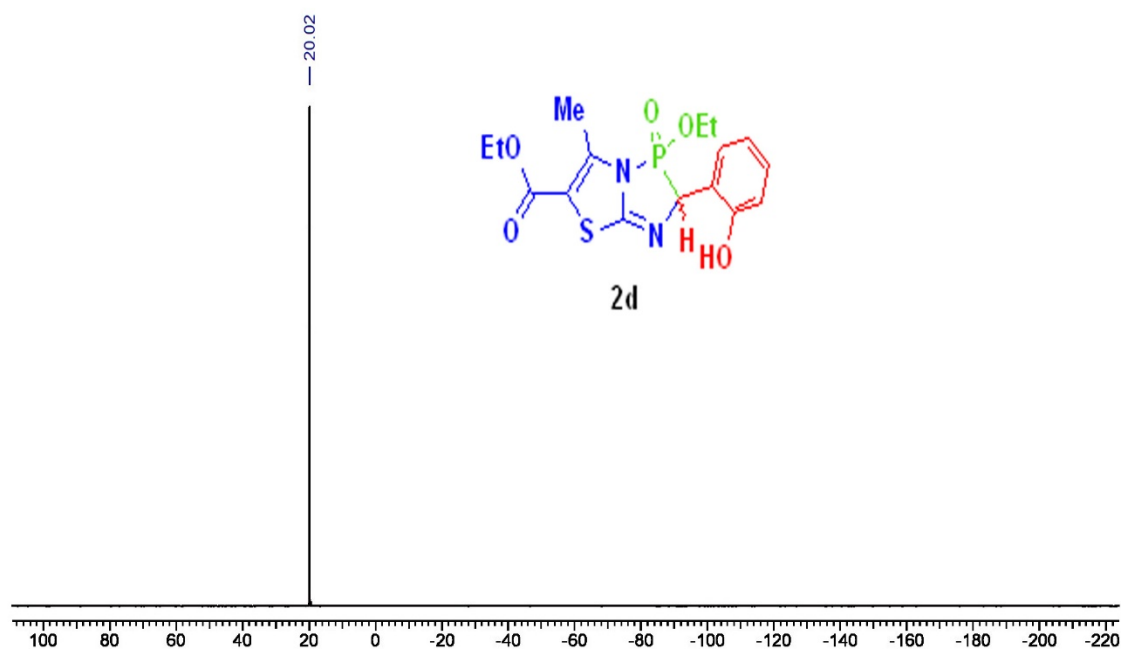

**Figure S15:** The <sup>31</sup>P-NMR spectrum of compound 2d.

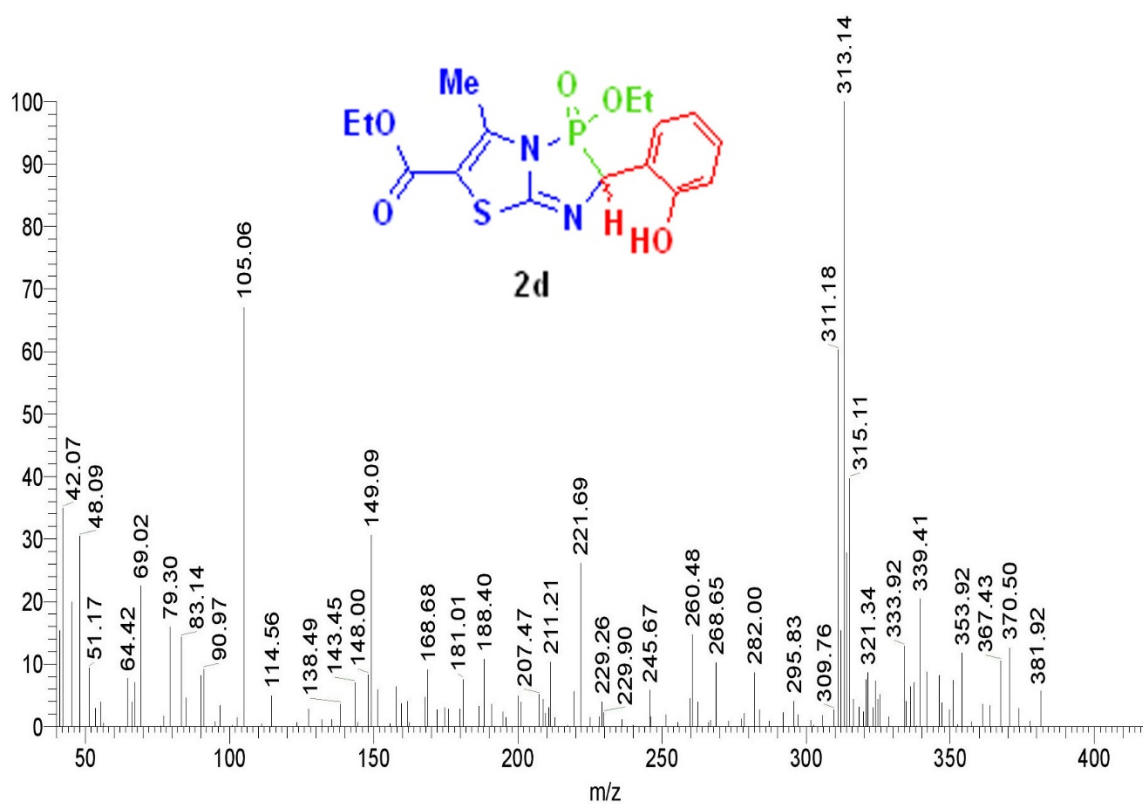

**Figure S16:** The mass spectrum of compound 2d.

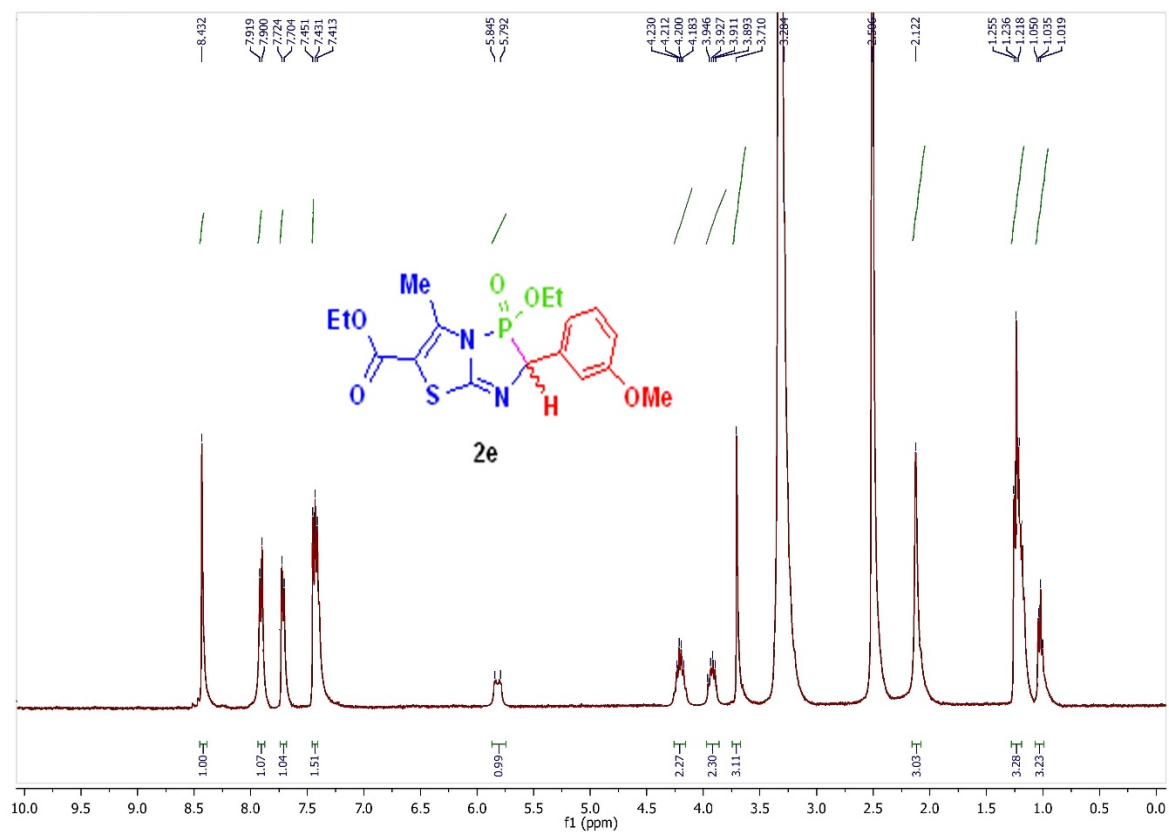

**Figure S17:** The  $^1\text{H}$ -NMR spectrum of compound **2e**.

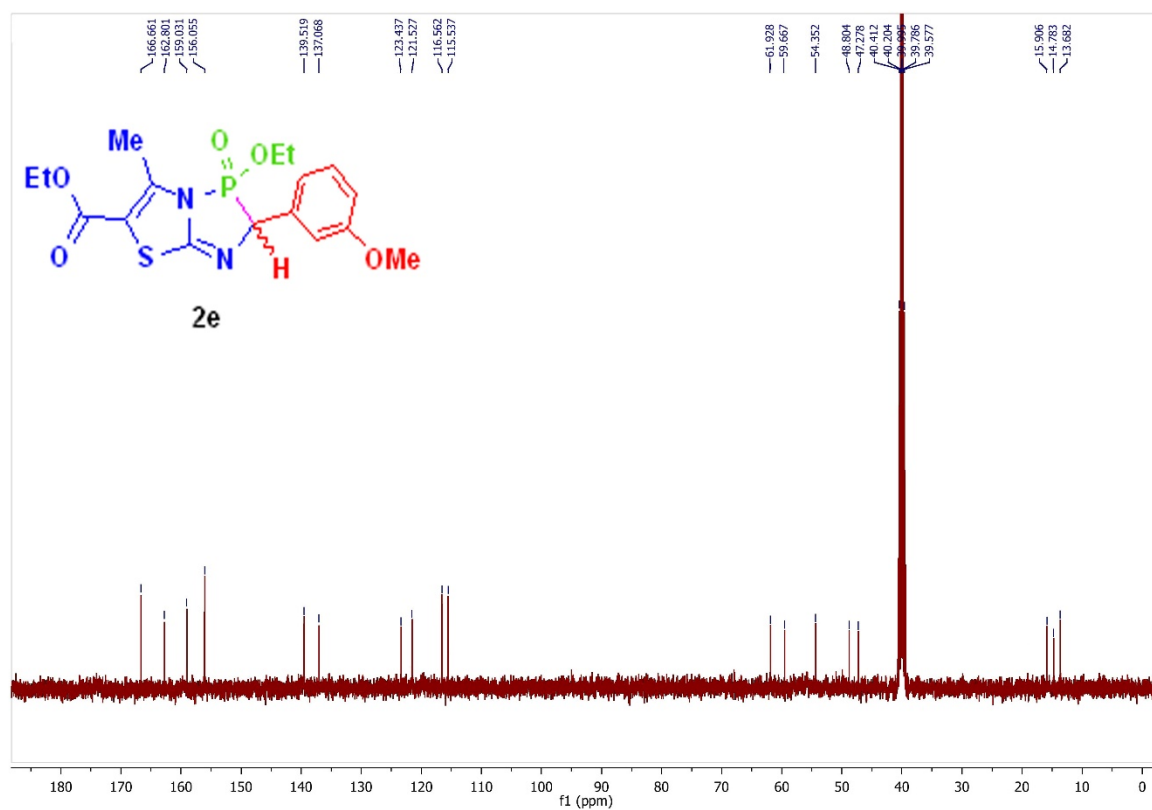

**Figure S18:** The  $^{13}\text{C}$ -NMR spectrum of compound **2e**.

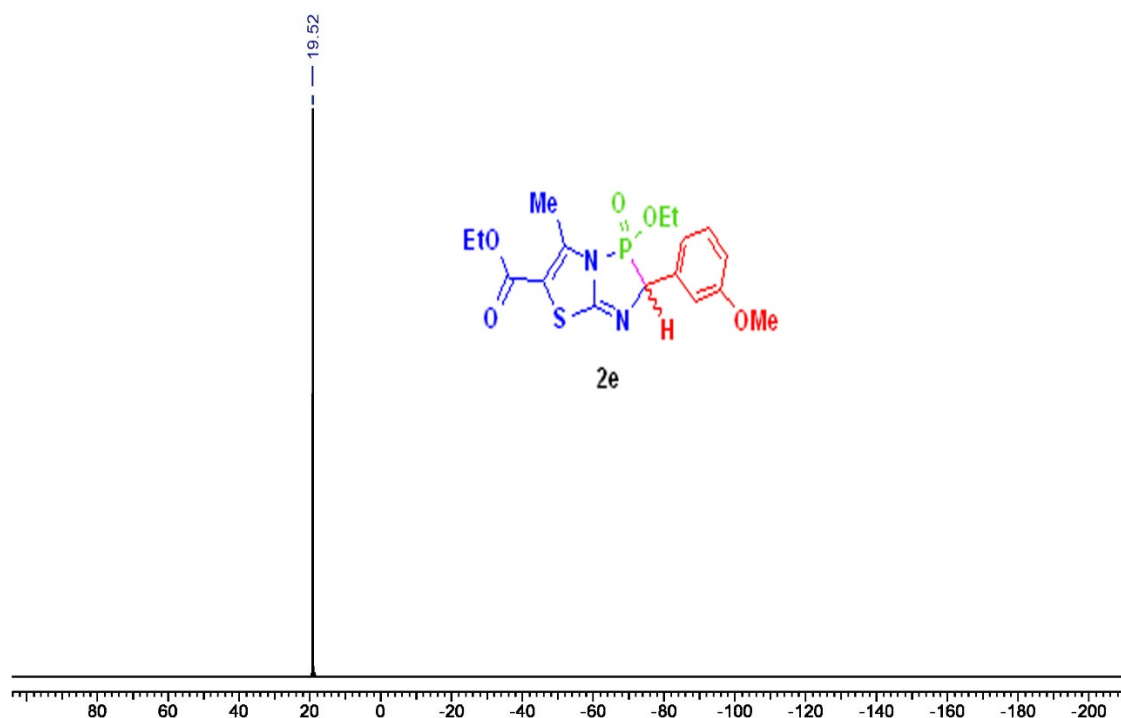

**Figure S19:** The <sup>31</sup>P-NMR spectrum of compound 2e.

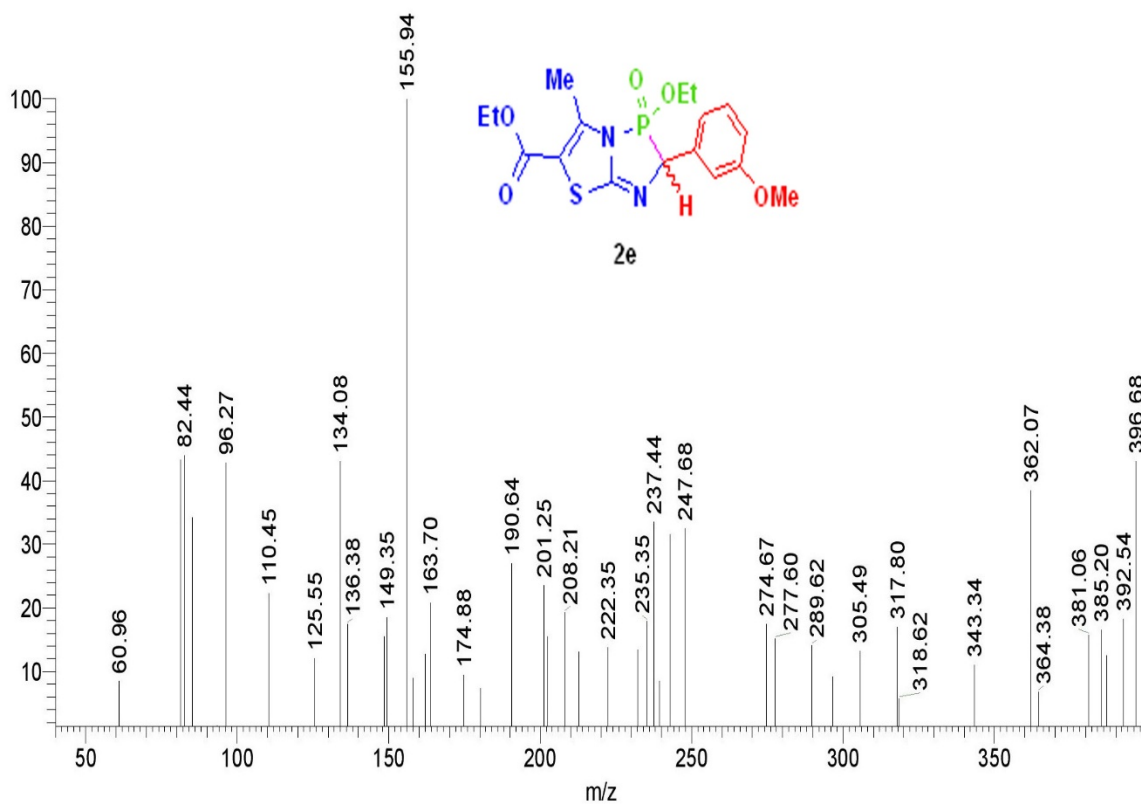

**Figure S20:** The mass spectrum of compound 2e.

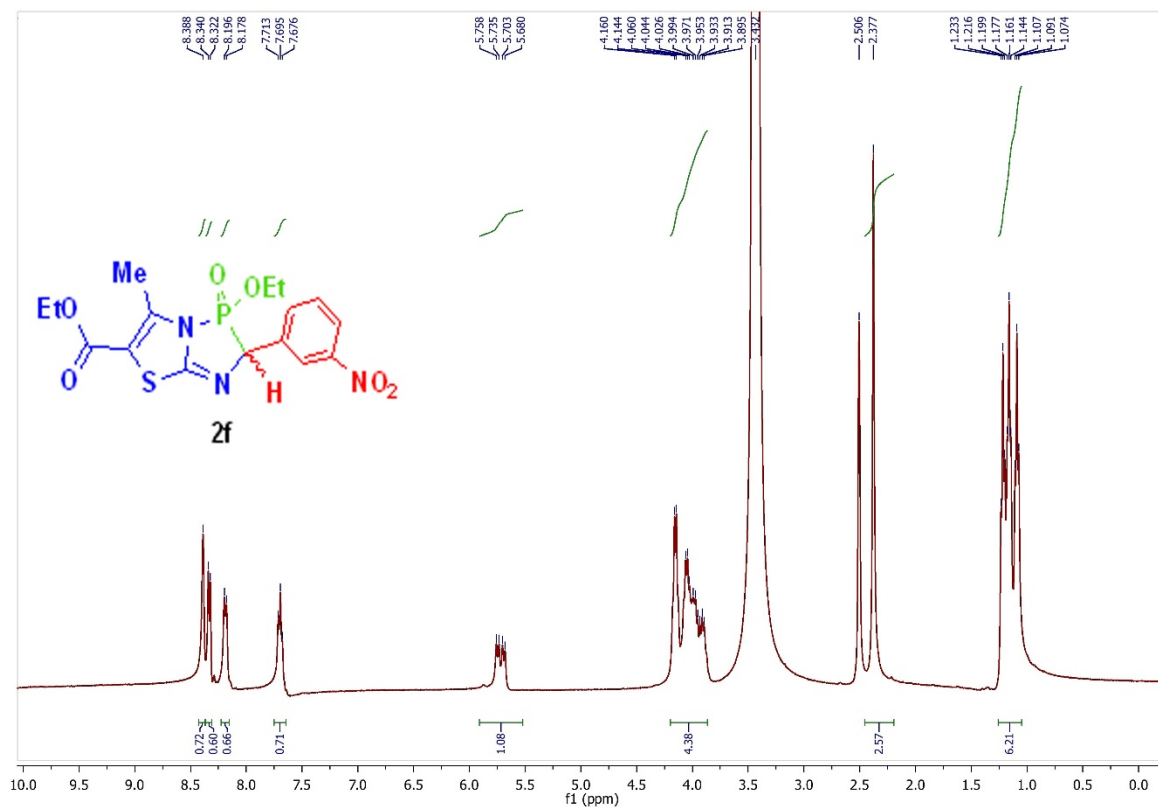

**Figure S21:** The <sup>1</sup>H-NMR spectrum of compound **2f**.

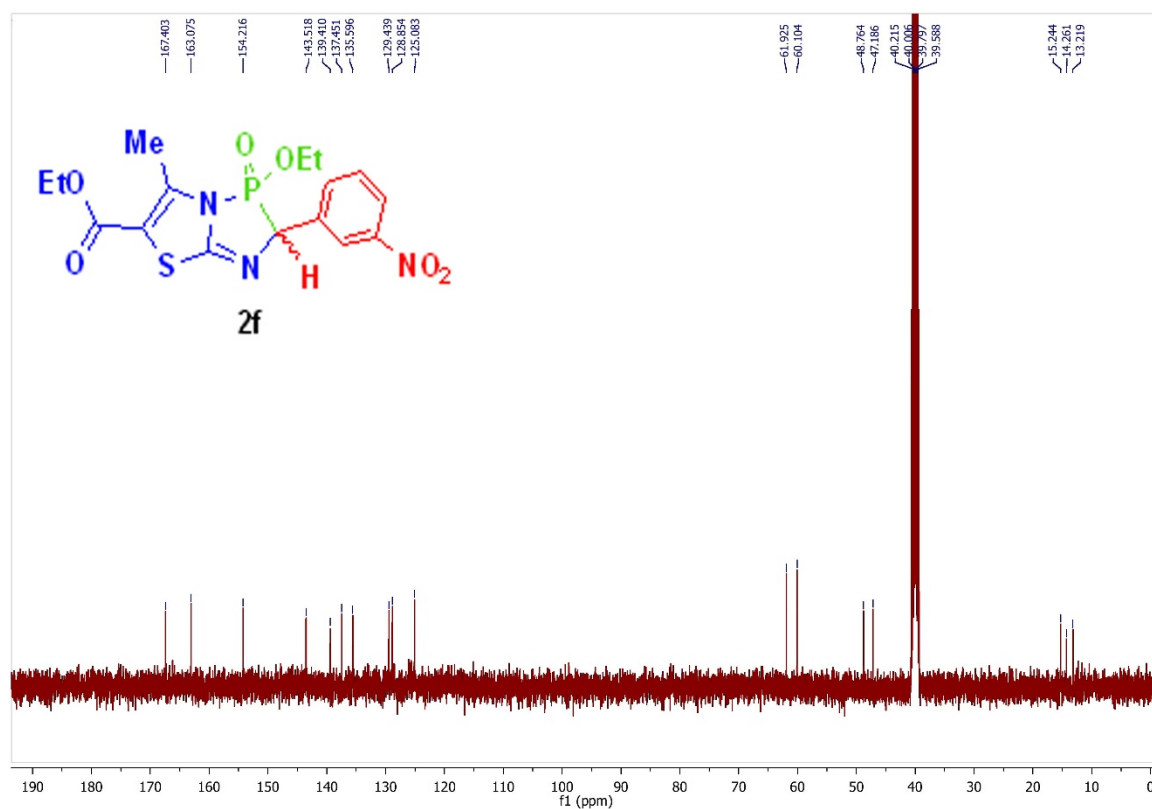

**Figure S22:** The <sup>13</sup>C-NMR spectrum of compound **2f**.

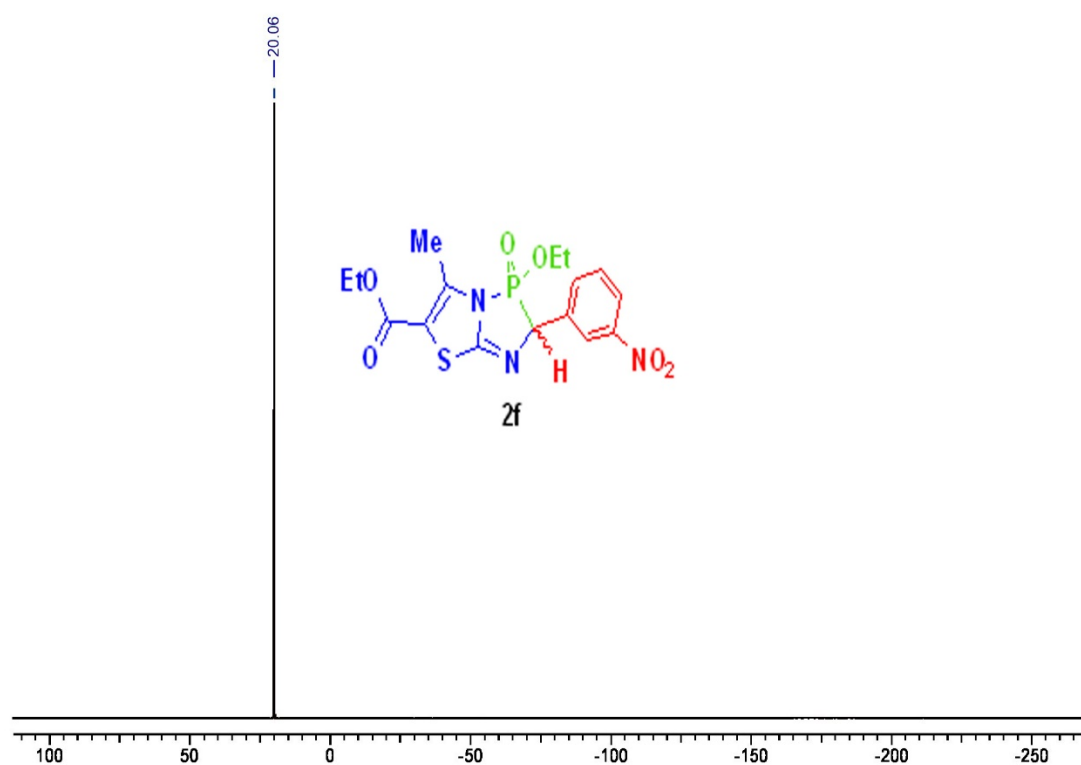

**Figure S23:** The <sup>31</sup>P-NMR spectrum of compound **2f**.

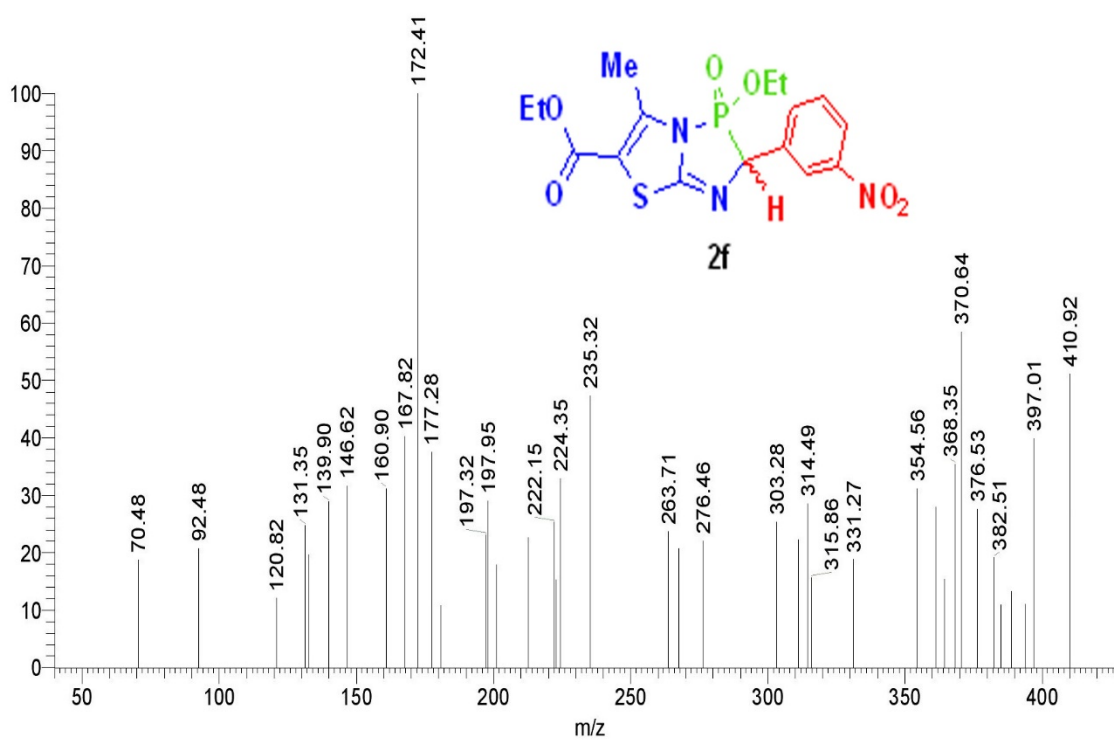

**Figure S24:** The mass spectrum of compound **2f**.

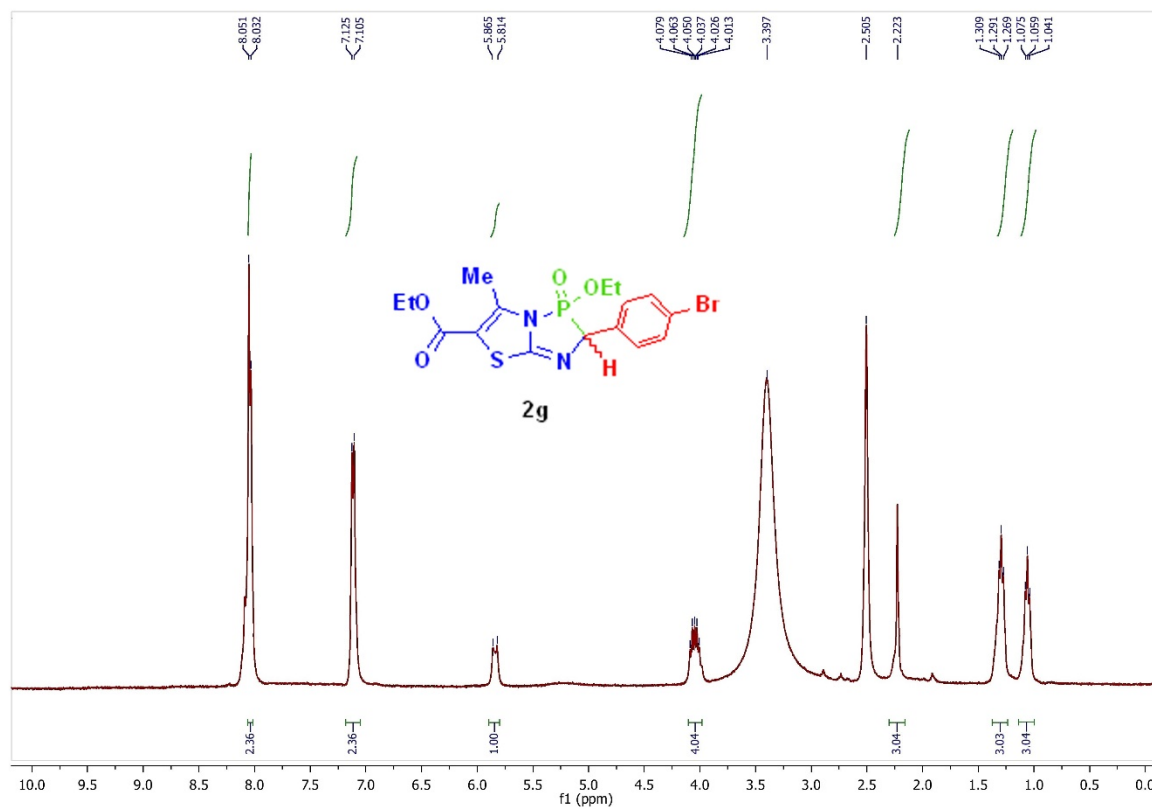

Figure S25: The <sup>1</sup>H-NMR spectrum of compound **2g**.

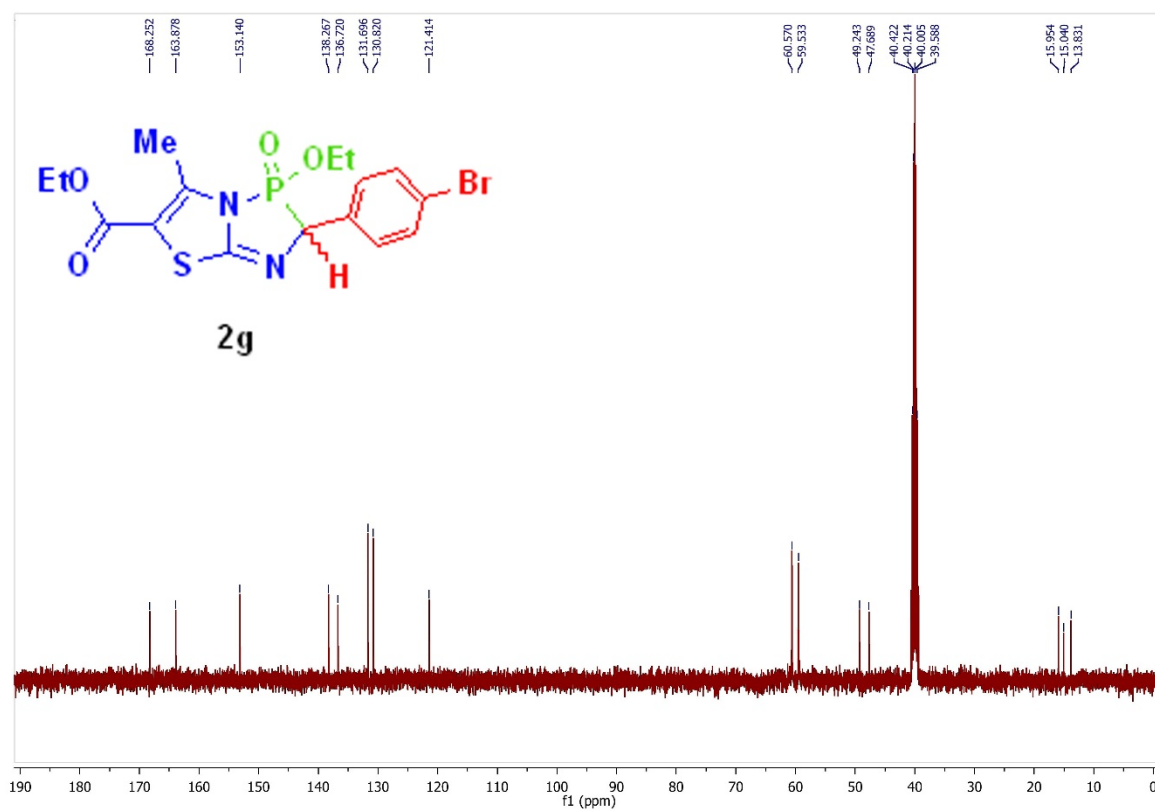

Figure S26: The <sup>13</sup>C-NMR spectrum of compound **2g**.

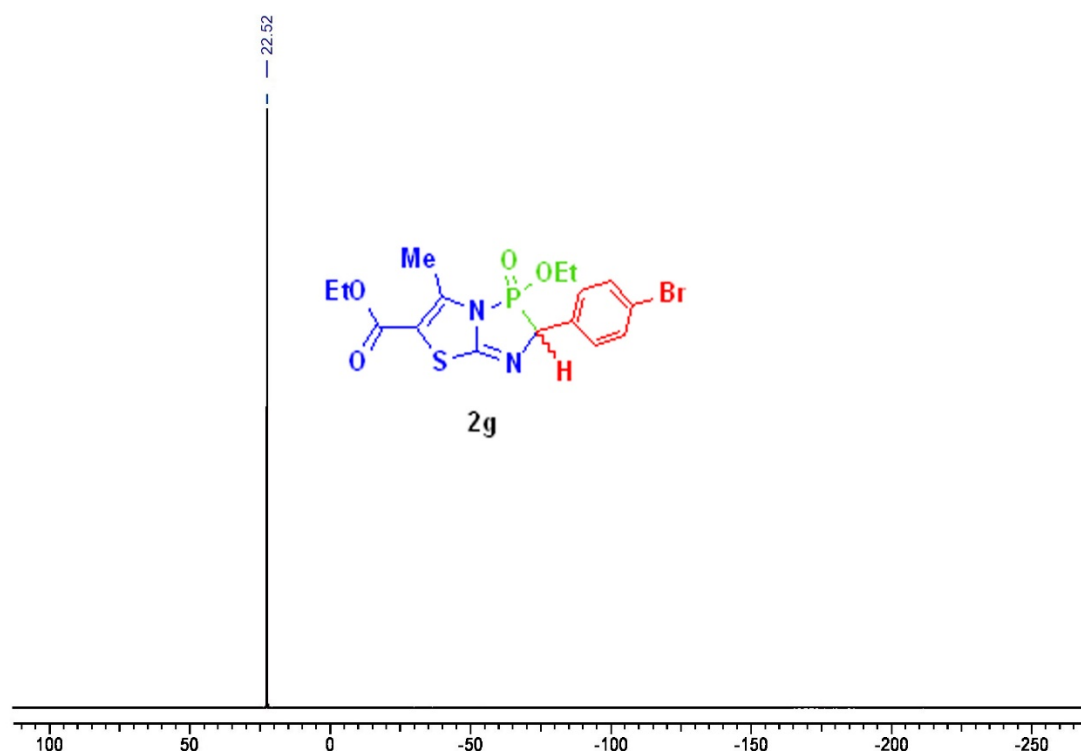

Figure S27: The <sup>31</sup>P-NMR spectrum of compound **2g**.

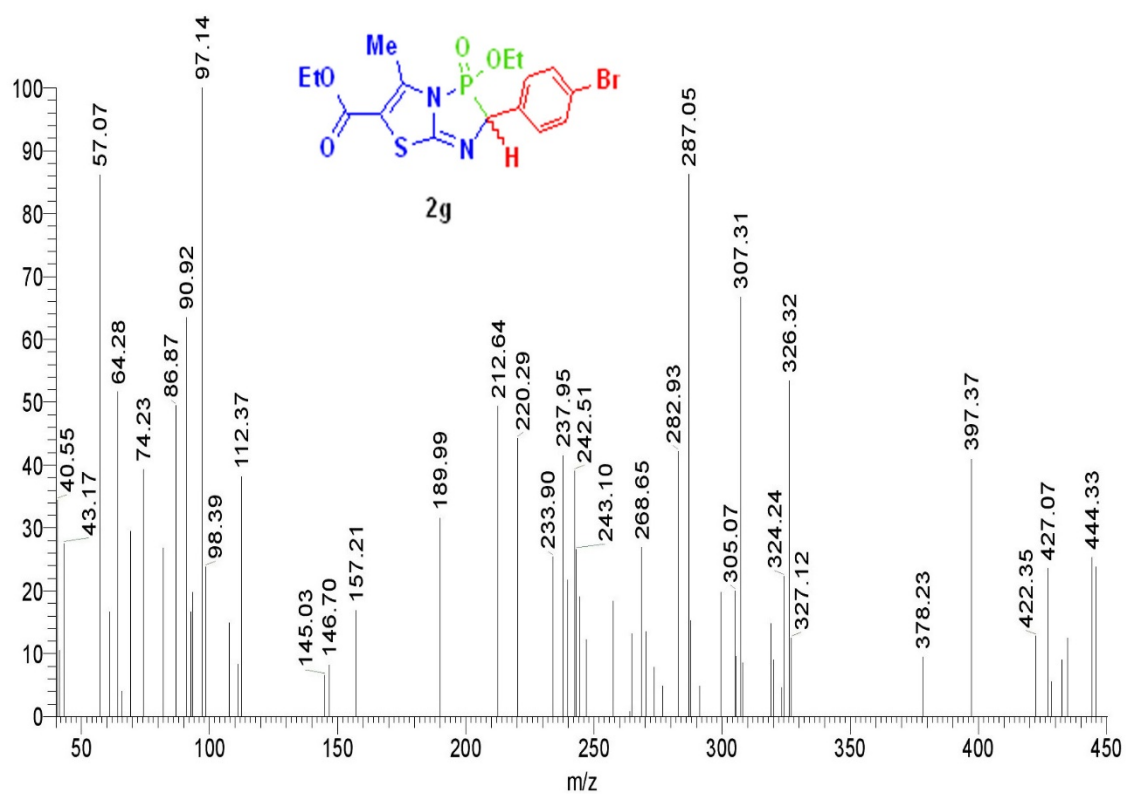

Figure S28: The mass spectrum of compound **2g**.

Fig

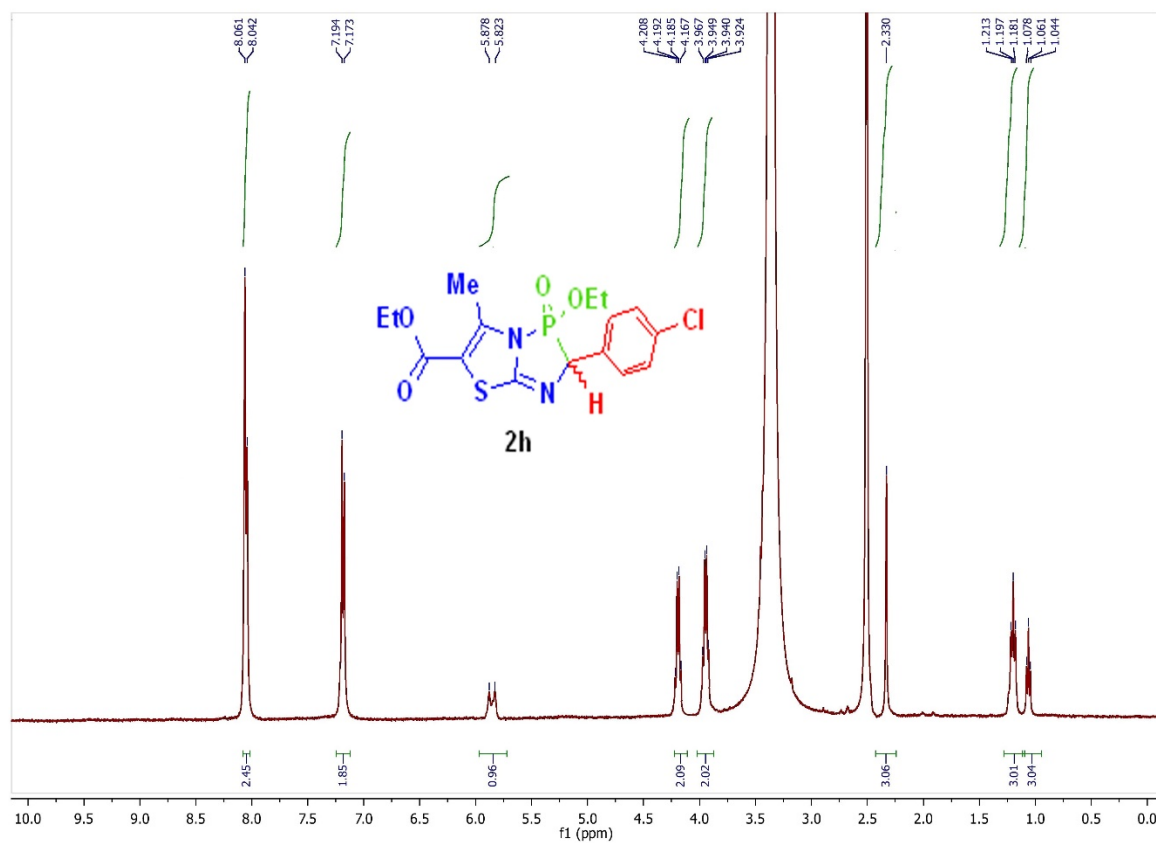

**Figure S29:** The <sup>1</sup>H-NMR spectrum of compound **2h**.

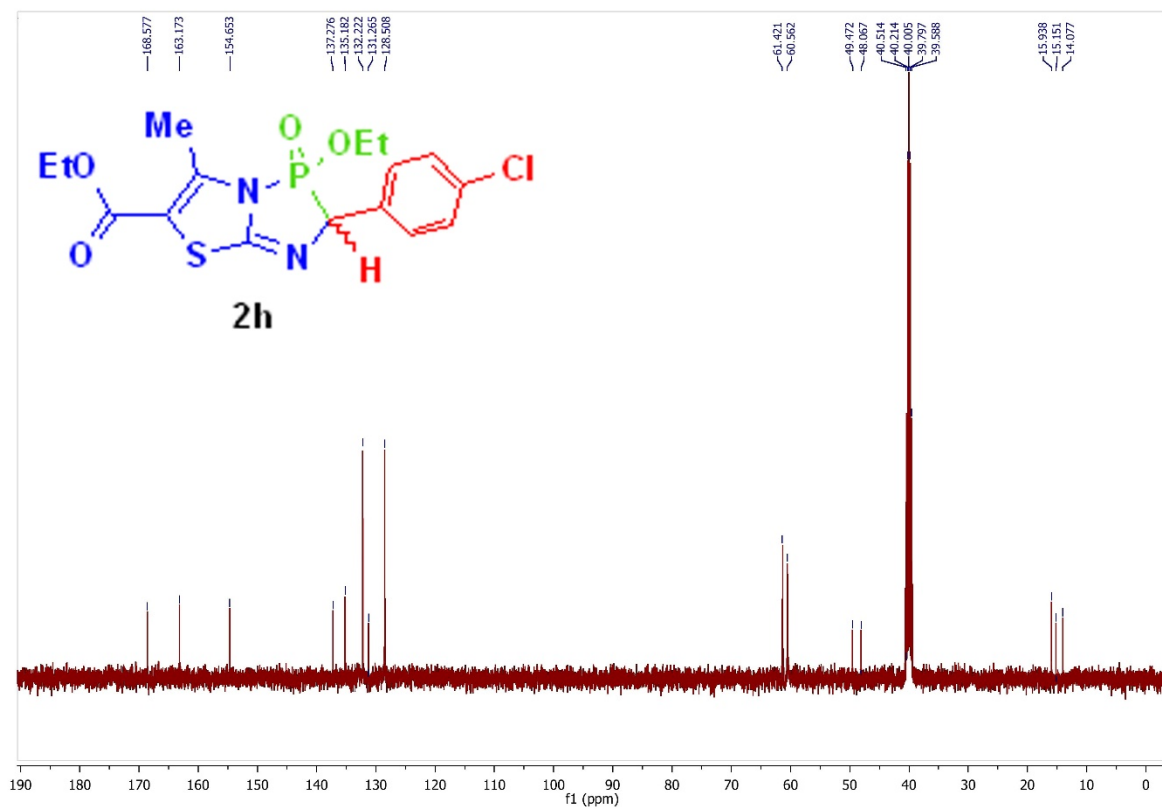

**Figure S30:** The <sup>13</sup>C-NMR spectrum of compound **2h**.

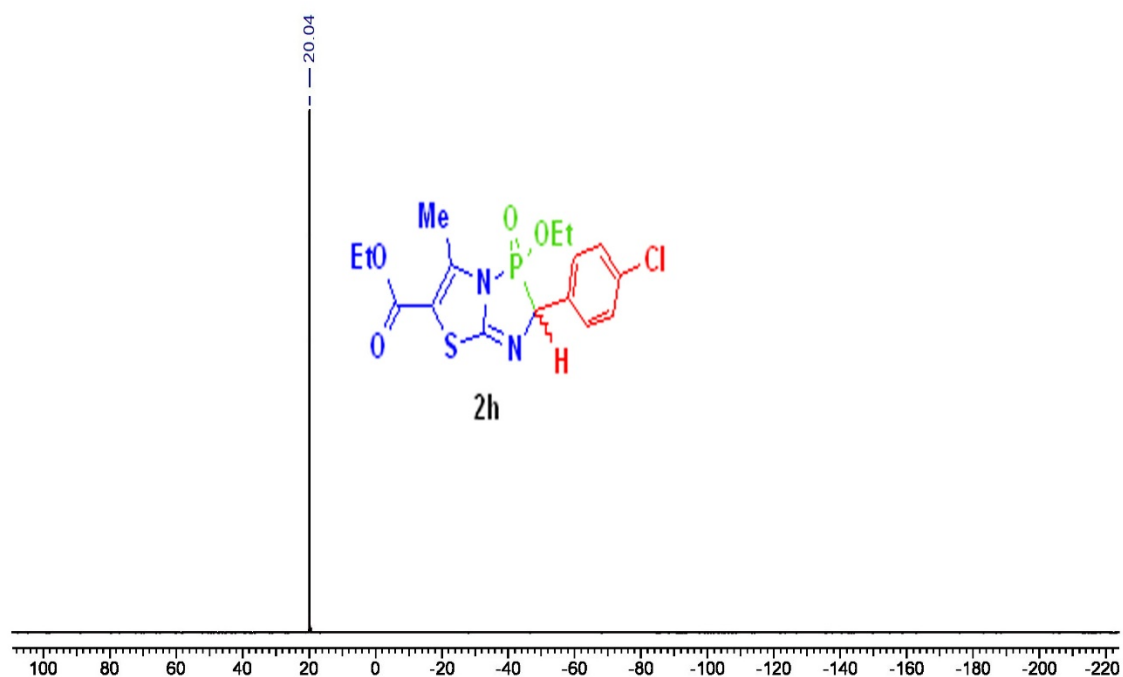

**Figure S31:** The  $^{31}\text{P}$ -NMR spectrum of compound **2h**.

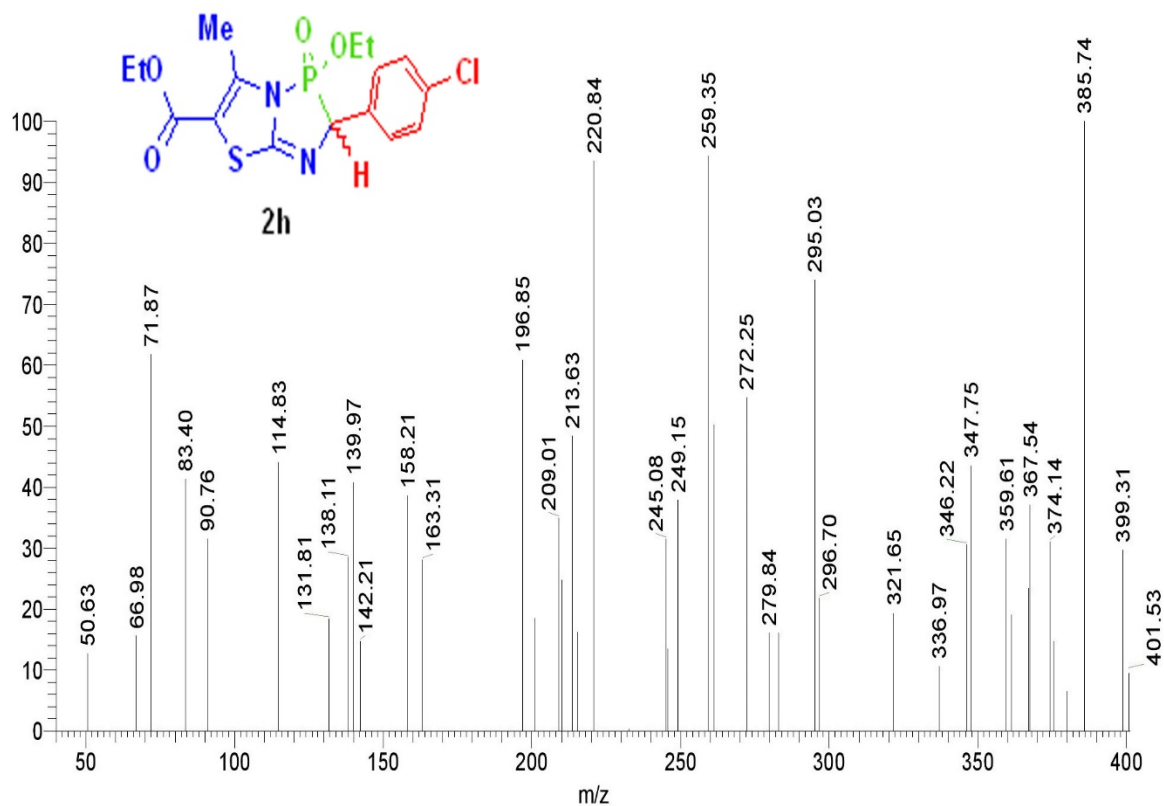

**Figure S32:** The mass spectrum of compound **2h**.

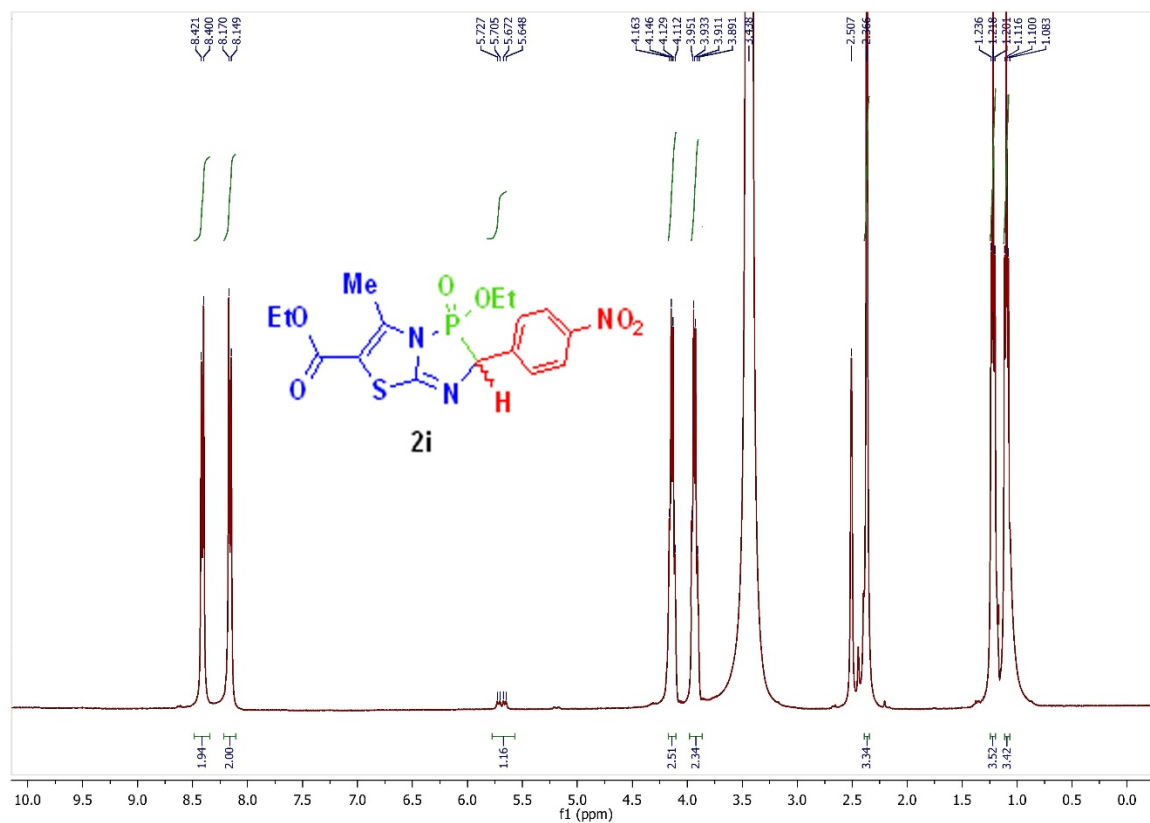

Figure S33: The <sup>1</sup>H-NMR spectrum of compound **2i**.

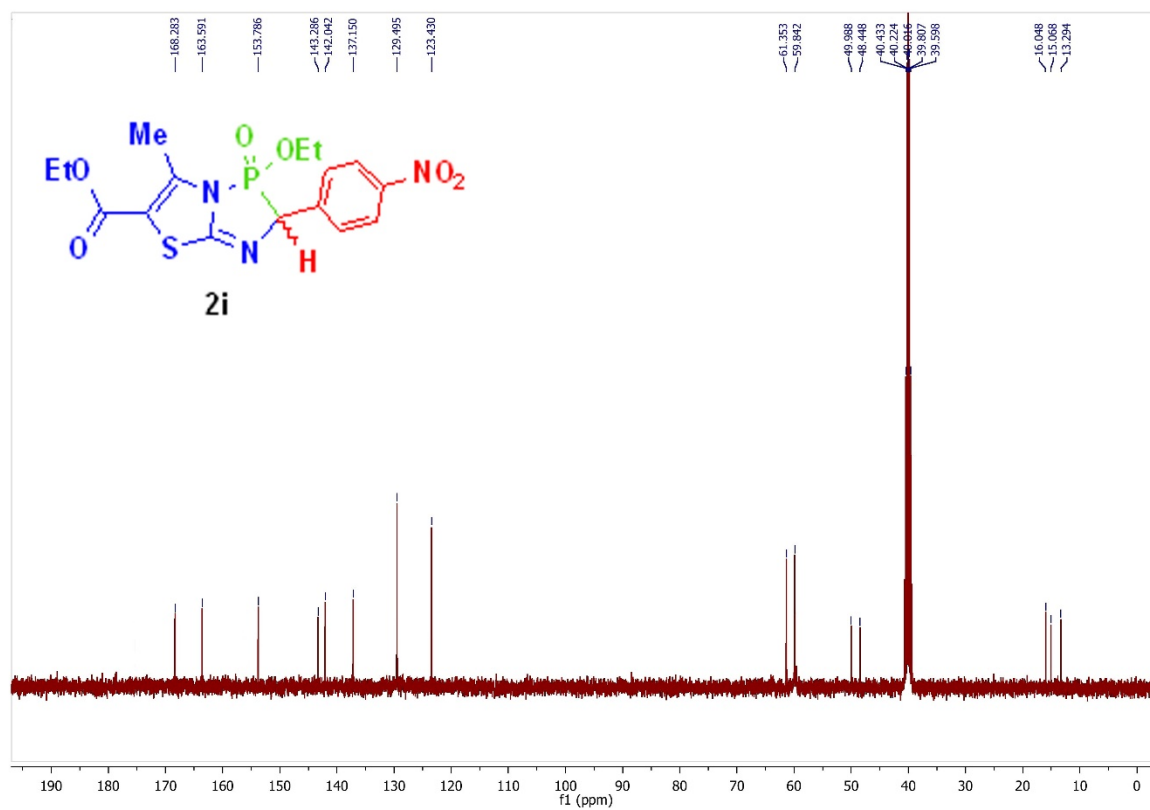

Figure S34: The <sup>13</sup>C-NMR spectrum of compound **2i**.

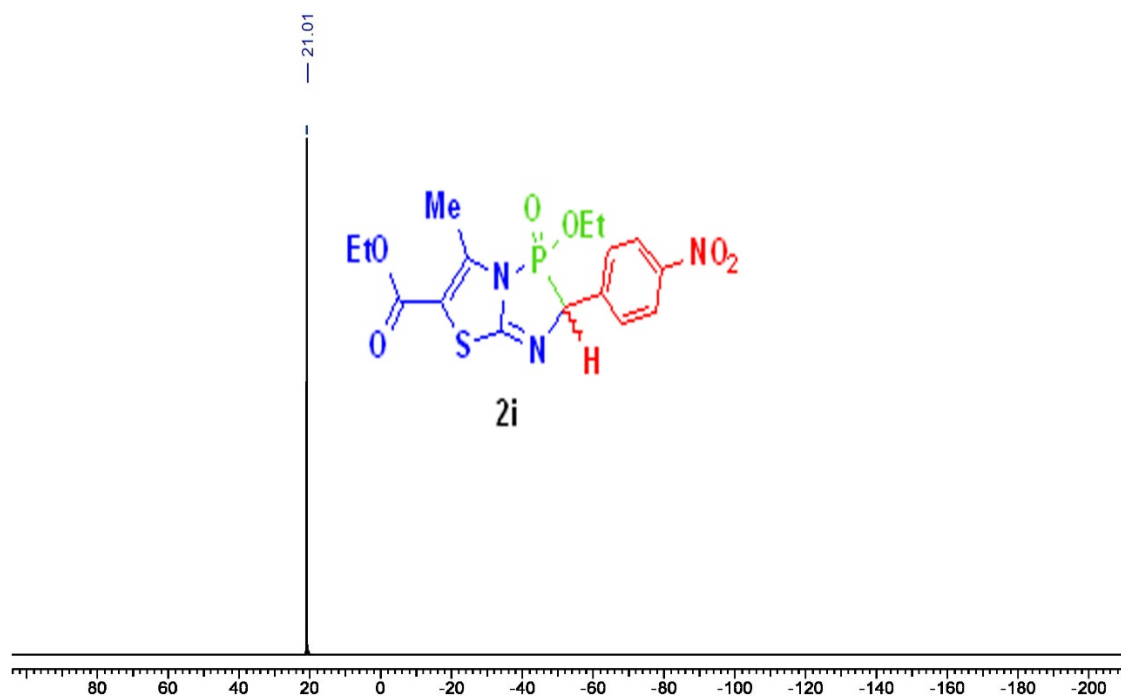

**Figure S35:** The  $^{31}\text{P}$ -NMR spectrum of compound **2i**.

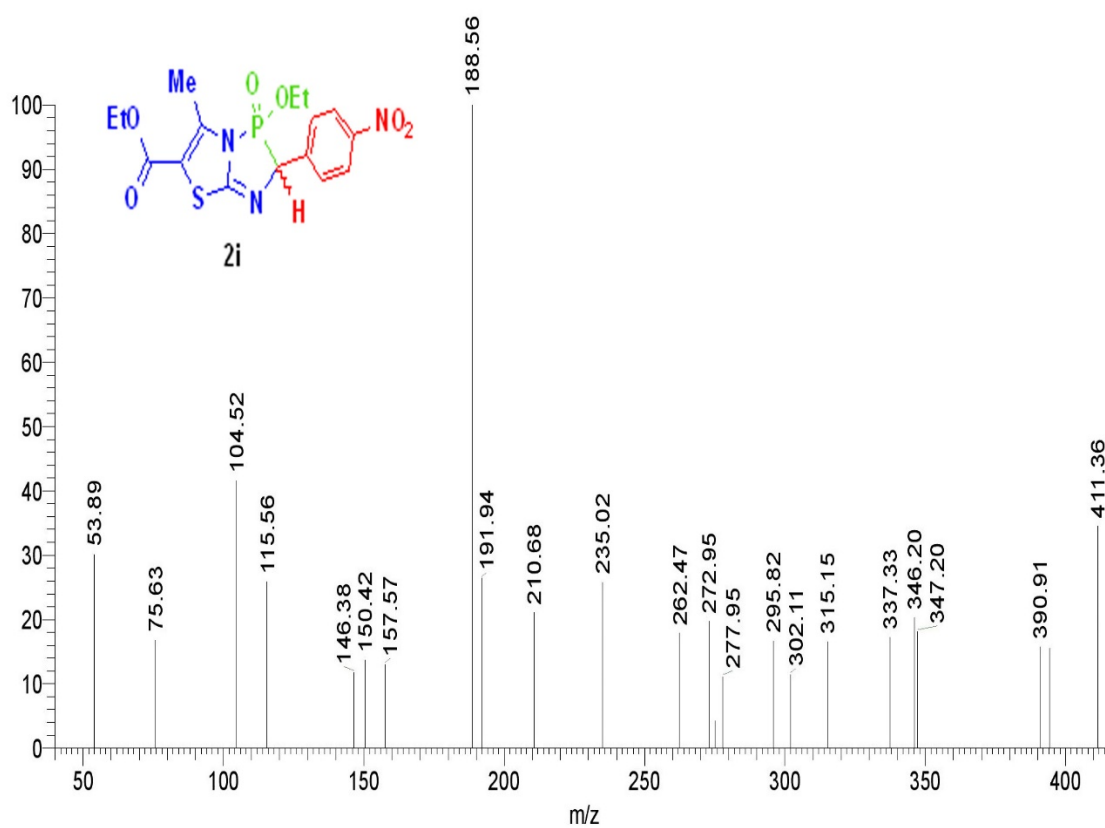

**Figure S36:** The mass spectrum of compound **2i**.

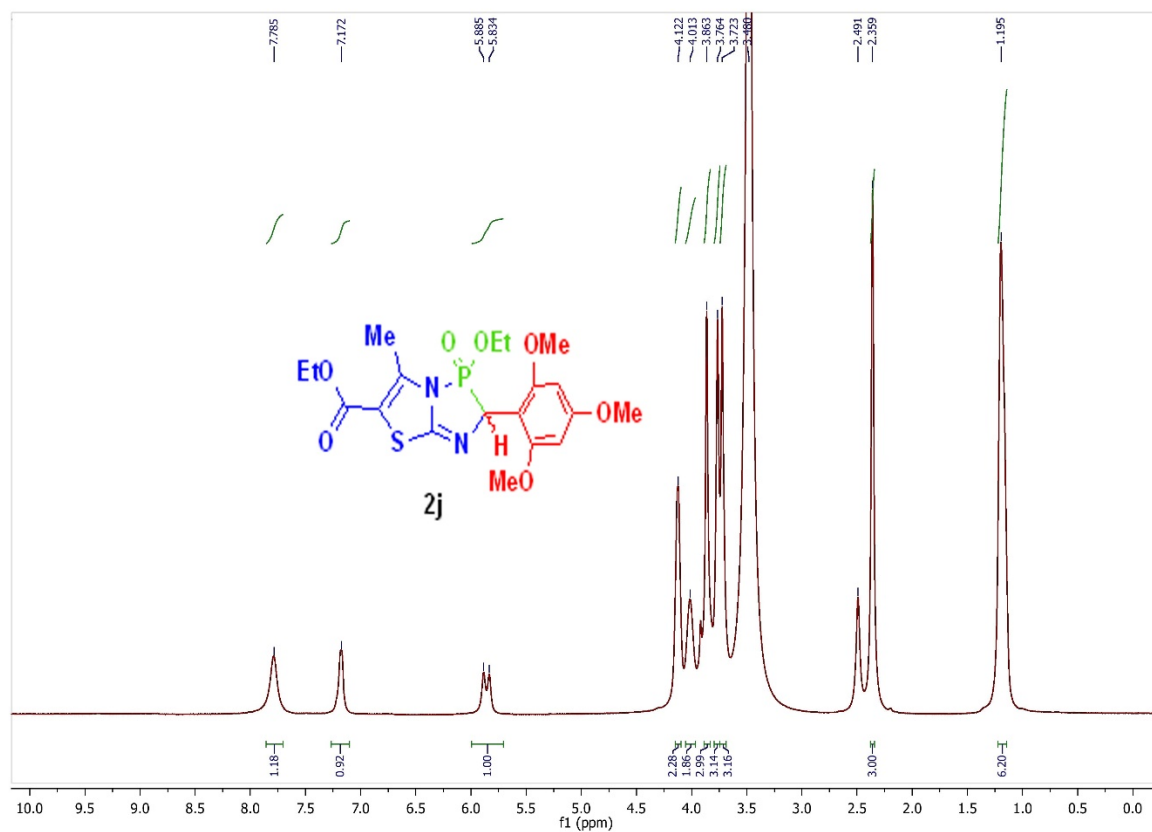

**Figure S37:** The  $^1\text{H}$ -NMR spectrum of compound **2j**.

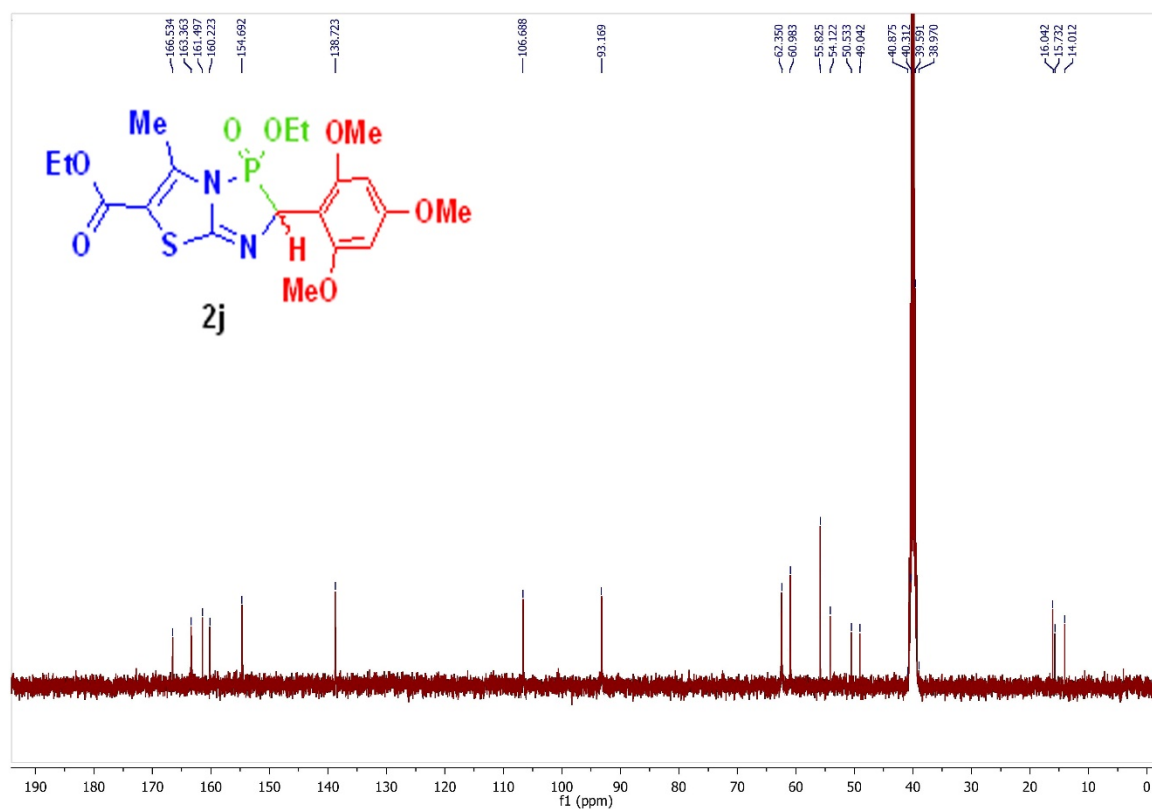

**Figure S38:** The  $^{13}\text{C}$ -NMR spectrum of compound **2j**.

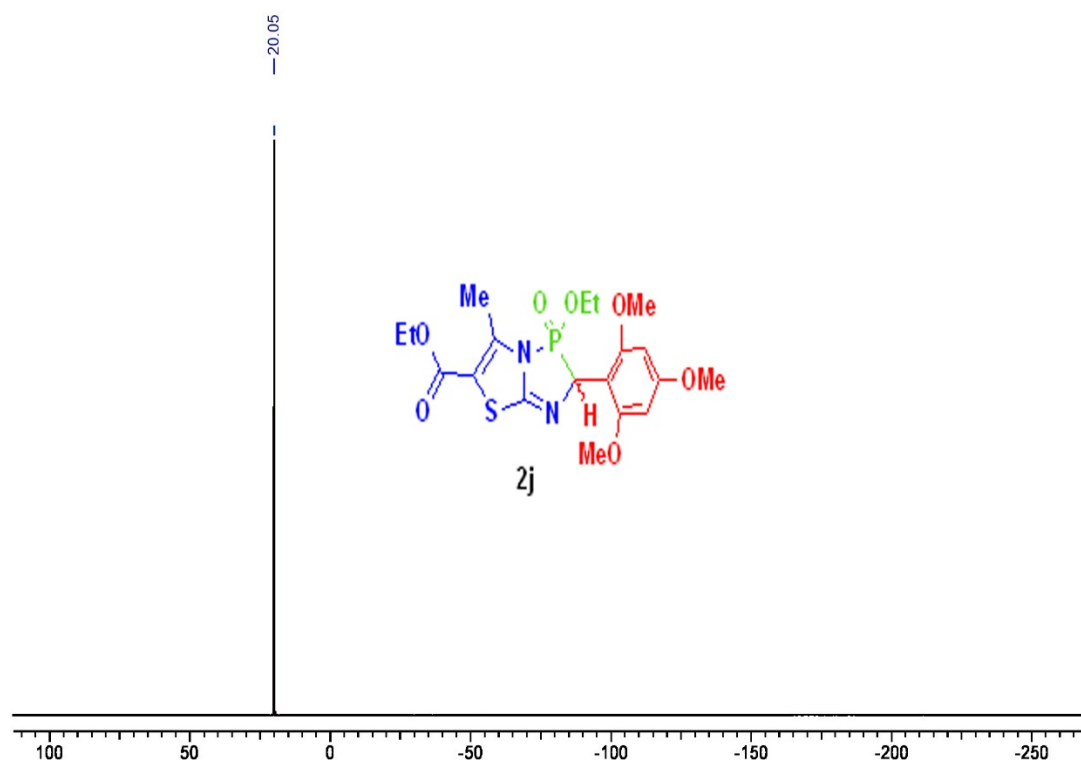

**Figure S39:** The  $^{31}\text{P}$ -NMR spectrum of compound **2j**.

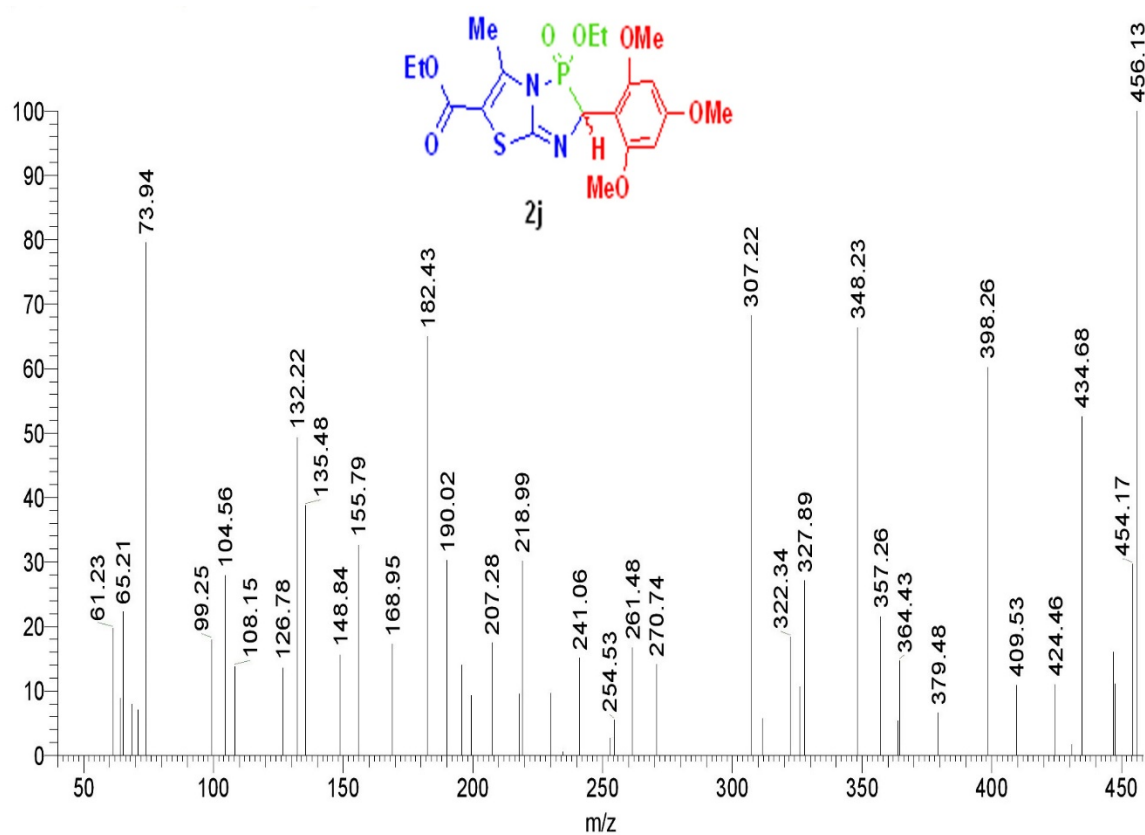

**Figure S40:** The mass spectrum of compound **2j**.
